# Supplementary material
Source: PubMed Central journal article supplement (PMC3843950)
Supplement: NIHMS506023-supplement-1_si_001.pdf [file NIHMS506023-supplement-1_si_001.pdf]

**Supplemental Information****Hydrogen Activation by Biomimetic [NiFe]-Hydrogenase Model Containing Protected Cyanide Cofactors**

Brian C. Manor and Thomas B. Rauchfuss\*

School of Chemical Sciences, University of Illinois

**Table of Contents**

- p. S3-5 Additional synthetic procedures
- p. S6 Table S1. IR data for new and related complexes.
- p. S7 Figure S1. IR spectrum of cis-CO/trans-CN and cis-CO/trans-CN isomers of **2** in CH<sub>2</sub>Cl<sub>2</sub> solution.
- p. S8 Figure S2. <sup>31</sup>P NMR spectrum of the cis-CO/trans-CN and cis-CO/trans-CN isomers of **2** in a CD<sub>2</sub>Cl<sub>2</sub> solution.
- p. S9 Figure S3. IR spectrum of the cis-CO/trans-CN isomer of **1**(BAR<sup>F</sup><sub>3</sub>)<sub>2</sub> in a CH<sub>2</sub>Cl<sub>2</sub> solution.
- p. S10 Figure S4. IR spectrum of the trans-CO/cis-CN isomer of **1**(BAR<sup>F</sup><sub>3</sub>)<sub>2</sub> in a CH<sub>2</sub>Cl<sub>2</sub> solution.
- p. S11 Figure S5. IR spectrum of the cis-CO/cis-CN isomer of **1**(BAR<sup>F</sup><sub>3</sub>)<sub>2</sub> in a CH<sub>2</sub>Cl<sub>2</sub> solution.
- p. S12 Figure S6. <sup>19</sup>F NMR spectrum of the cis-CO/trans-CN isomer of **1**(BAR<sup>F</sup><sub>3</sub>)<sub>2</sub> in a CD<sub>2</sub>Cl<sub>2</sub> solution.
- p. S13 Figure S7. <sup>19</sup>F NMR spectrum of the trans-CO/cis-CN isomer of **1**(BAR<sup>F</sup><sub>3</sub>)<sub>2</sub> in a CD<sub>2</sub>Cl<sub>2</sub> solution.
- p. S14 Figure S8. <sup>19</sup>F NMR spectrum of the cis-CO/cis-CN isomer of **1**(BAR<sup>F</sup><sub>3</sub>)<sub>2</sub> in a CD<sub>2</sub>Cl<sub>2</sub> solution.
- p. S15 Figure S9. <sup>31</sup>P NMR spectrum of the cis-CO/trans-CN isomer of **1**(BAR<sup>F</sup><sub>3</sub>)<sub>2</sub> in a CD<sub>2</sub>Cl<sub>2</sub> solution.
- p. S16 Figure S10. <sup>31</sup>P NMR spectrum of the trans-CO/cis-CN isomer of **1**(BAR<sup>F</sup><sub>3</sub>)<sub>2</sub> in a CD<sub>2</sub>Cl<sub>2</sub> solution.
- p. S17 Figure S11. <sup>31</sup>P NMR spectrum of the cis-CO/cis-CN isomer of **1**(BAR<sup>F</sup><sub>3</sub>)<sub>2</sub> in a CD<sub>2</sub>Cl<sub>2</sub> solution.
- p. S18. Figure S12. IR spectrum of cis-CO/trans-CN and cis-CO/trans-CN isomers of **2**(BARF<sub>3</sub>)<sub>2</sub> in CH<sub>2</sub>Cl<sub>2</sub> solution.
- p. S19 Figure S13. IR spectrum of the trans-CO/cis-CN isomer of **2**(BARF<sub>3</sub>)<sub>2</sub> in CH<sub>2</sub>Cl<sub>2</sub> solution.
- p. S20 Figure S14. <sup>31</sup>P NMR spectrum of cis-CO/trans-CN and cis-CO/trans-CN isomers of **2**(BARF<sub>3</sub>)<sub>2</sub> in CD<sub>2</sub>Cl<sub>2</sub> solution.
- p. S21 Figure S15. <sup>31</sup>P NMR spectrum of the trans-CO/cis-CN isomer of **2**(BARF<sub>3</sub>)<sub>2</sub> in CH<sub>2</sub>Cl<sub>2</sub> solution.
- p. S22 Figure S16. IR spectrum of Et<sub>4</sub>N[H**3**(BAR<sup>F</sup><sub>3</sub>)<sub>2</sub>] in CH<sub>2</sub>Cl<sub>2</sub> solution.
- p. S23 Figure S17. <sup>1</sup>H NMR spectrum of Et<sub>4</sub>N[H**3**(BAR<sup>F</sup><sub>3</sub>)<sub>2</sub>] in CD<sub>2</sub>Cl<sub>2</sub> solution.
- p. S24 Figure S18. <sup>19</sup>F NMR spectrum of Et<sub>4</sub>N[H**3**(BAR<sup>F</sup><sub>3</sub>)<sub>2</sub>] in CD<sub>2</sub>Cl<sub>2</sub> solution.
- p. S25 Figure S19. <sup>31</sup>P NMR spectrum of Et<sub>4</sub>N[H**3**(BAR<sup>F</sup><sub>3</sub>)<sub>2</sub>] in CD<sub>2</sub>Cl<sub>2</sub> solution.

- p. S26 Figure S20. IR spectrum of  $\text{Et}_4\text{N}[\text{H4}(\text{BAr}^{\text{F}}_3)_2]$  in  $\text{CH}_2\text{Cl}_2$  solution.
- p. S27 Figure S21.  $^1\text{H}$  NMR spectrum of  $\text{Et}_4\text{N}[\text{H4}(\text{BAr}^{\text{F}}_3)_2]$  in  $\text{CD}_2\text{Cl}_2$  solution.
- p. S28 Figure S22.  $^{19}\text{F}$  NMR spectrum of  $\text{Et}_4\text{N}[\text{H4}(\text{BAr}^{\text{F}}_3)_2]$  in  $\text{CD}_2\text{Cl}_2$  solution.
- p. S29 Figure S23.  $^{31}\text{P}$  NMR spectrum of  $\text{Et}_4\text{N}[\text{H4}(\text{BAr}^{\text{F}}_3)_2]$  in  $\text{CD}_2\text{Cl}_2$  solution.
- p. S30 Figure S24. IR spectrum of  $\text{Et}_4\text{N}[\text{Cl3}(\text{BAr}^{\text{F}}_3)_2]$  in  $\text{CH}_2\text{Cl}_2$  solution.
- p. S31 Figure S25.  $^{19}\text{F}$  NMR spectrum of  $\text{Et}_4\text{N}[\text{Cl3}(\text{BAr}^{\text{F}}_3)_2]$  in  $\text{CD}_2\text{Cl}_2$  solution.
- p. S32 Figure S26.  $^{31}\text{P}$  NMR spectrum of  $\text{Et}_4\text{N}[\text{Cl3}(\text{BAr}^{\text{F}}_3)_2]$  in  $\text{CD}_2\text{Cl}_2$  solution.
- p. S33 Figure S27.  $^1\text{H}$  NMR spectrum of  $\text{HNMe}_3\text{BAr}^{\text{F}24}$  in  $\text{CD}_2\text{Cl}_2$  solution.
- p. S34 Figure S28. Cyclic voltammogram of the reduction of  $\text{Et}_4\text{N}[\text{H3}(\text{BAr}^{\text{F}}_3)_2]$  at varying scan rates in  $\text{CH}_2\text{Cl}_2$ .
- p. S35 Figure S29. Cyclic voltammogram of the oxidation of  $\text{Et}_4\text{N}[\text{H3}(\text{BAr}^{\text{F}}_3)_2]$  at varying scan rates in  $\text{CH}_2\text{Cl}_2$ .
- p. S36 Figure S30. Cyclic voltammogram of the oxidation of  $\text{Et}_4\text{N}[\text{H4}(\text{BAr}^{\text{F}}_3)_2]$  at varying scan rates in  $\text{CH}_2\text{Cl}_2$ .
- p. S37 Determination of the equilibrium constant for dihydrogen bonding
- p. S37 Table S2.  $^1\text{H}$  NMR signals for the titration of  $\text{Et}_4\text{N}[\text{H3}(\text{BAr}^{\text{F}}_3)_2]$  with  $\text{HNMe}_3\text{BAr}^{\text{F}24}$
- p. S37 Table S3.  $\text{H}_2$  Production from  $\text{Et}_4\text{N}[\text{H3}(\text{BAr}^{\text{F}}_3)_2]$  and  $\text{PhNH}_3\text{BAr}^{\text{F}24} \cdot 2\text{Et}_2\text{O}$
- p. S38 Electrocatalytic Oxidation of  $\text{H}_2$
- p. S38 Figure S31. Electrocatalytic oxidation of  $\text{H}_2$  by  $\text{Et}_4\text{N}[\text{H3}(\text{BAr}^{\text{F}}_3)_2]$  in the presence of DBU.
- p. S39 References

### Additional Synthetic Procedures

**Isomerization of 1(BAr<sup>F</sup><sub>3</sub>)<sub>2</sub>.** A solution of the cis-CO/trans-CN isomer of 1(BAr<sup>F</sup><sub>3</sub>)<sub>2</sub> (10 mg, 0.006 mmol) in CD<sub>2</sub>Cl<sub>2</sub> (1 mL) was loaded into an NMR tube fitted with a J Young valve and irradiated by a 365 nm LED array for 3h. <sup>19</sup>F and <sup>31</sup>P NMR measurements showed conversion of the initial isomer to a 3:1 ratio of the trans-CO/cis-CN and cis-CO/cis-CN isomers. Upon sitting in the absence of light for 5 days, the mixture shifted to a 1:25 ratio of the trans-CO/cis-CN and cis-CO/trans-CN isomers.

*trans-CO/cis-CN*: IR(CH<sub>2</sub>Cl<sub>2</sub>): ν<sub>CN</sub> = 2215, 2201 cm<sup>-1</sup>, ν<sub>CO</sub> = 2087(w), 2030 cm<sup>-1</sup>. <sup>31</sup>P NMR (CD<sub>2</sub>Cl<sub>2</sub>): δ 58.7 (s). <sup>19</sup>F NMR (CD<sub>2</sub>Cl<sub>2</sub>): □135.2 (d, o-F), □160.6 (t, p-F), □166.5 (t, m-F).

*cis-CO/cis-CN*: IR(CH<sub>2</sub>Cl<sub>2</sub>): ν<sub>CN</sub> = 2214, 2202 cm<sup>-1</sup>, ν<sub>CO</sub> = 2070, 2020 cm<sup>-1</sup>. <sup>31</sup>P NMR (CD<sub>2</sub>Cl<sub>2</sub>): δ 58.9, 58.5 (AB quartet, J<sub>PP</sub> = 37 Hz). <sup>19</sup>F NMR (CD<sub>2</sub>Cl<sub>2</sub>): □135.0 (d, o-F), □135.1 (d, o-F), □160.0 (t, p-F), □160.7 (t, p-F), □166.0 (t, m-F), □166.5 (t, m-F).

**Isomerization of 2(BAr<sup>F</sup><sub>3</sub>)<sub>2</sub>.** A solution of the cis-CO/trans-CN isomer of 2(BAr<sup>F</sup><sub>3</sub>)<sub>2</sub> (10 mg, 0.006 mmol) in CD<sub>2</sub>Cl<sub>2</sub> (1 mL) was loaded into an NMR tube fitted with a J Young valve and irradiated by a 365 nm LED array for 2 h. <sup>19</sup>F and <sup>31</sup>P NMR showed conversion of the initial isomer to the trans-CO/cis-CN isomer. No further isomerization was observed upon standing in the absence of light. IR(CH<sub>2</sub>Cl<sub>2</sub>): ν<sub>CN</sub> = 2214, 2200 cm<sup>-1</sup>, ν<sub>CO</sub> = 2084(w), 2027 cm<sup>-1</sup>. <sup>31</sup>P NMR (CD<sub>2</sub>Cl<sub>2</sub>): δ 75.1 (s). <sup>19</sup>F NMR (CD<sub>2</sub>Cl<sub>2</sub>): □135.0 (d, o-F), □160.4 (t, p-F), □166.2 (t, m-F).

**Borohydride Route to Et<sub>4</sub>N[(CO)(CNBAr<sup>F</sup><sub>3</sub>)<sub>2</sub>Fe(pdt)(H)Ni(dppe)], Et<sub>4</sub>N[H3(BAr<sup>F</sup><sub>3</sub>)<sub>2</sub>] (alternative to the H<sub>2</sub> route).** A solution of 1(BAr<sup>F</sup><sub>3</sub>)<sub>2</sub> (100 mg, 0.057 mmol) in 10 mL of CH<sub>2</sub>Cl<sub>2</sub> was treated with 1.2 mL (1.2 equiv.) of a stock solution of Me<sub>3</sub>NO in CH<sub>2</sub>Cl<sub>2</sub> (0.057 M) causing the solution to darken in color. The solution was quickly treated with a suspension of Et<sub>4</sub>NBH<sub>4</sub> (8.3 mg, 0.057 mmol) in 10 mL CH<sub>2</sub>Cl<sub>2</sub> and stirred for 30 minutes. The solvent was removed under reduced pressure and the resulting solid was extracted into 20 mL of Et<sub>2</sub>O and the mixture was passed through Celite. Once the solution was concentrated to approximately 3 mL, pentane (20 mL) was added, forming a brown solid which was isolated by filtration. The remaining workup is similar to that described with Me<sub>3</sub>NO and H<sub>2</sub>. Yield: 22 mg (21%). Crystals suitable for x-ray diffraction were grown by diffusion of pentane into a solution of Et<sub>4</sub>N[H3(BAr<sup>F</sup><sub>3</sub>)<sub>2</sub>] in dichloromethane at 0°C.

**Et<sub>4</sub>N[(CO)(CNBAr<sup>F</sup><sub>3</sub>)<sub>2</sub>Fe(pdt)(H)Ni(dcpe)], Et<sub>4</sub>N[H4(BAr<sup>F</sup><sub>3</sub>)<sub>2</sub>].** In a thick-walled glass pressure tube, a solution of 2(BAr<sup>F</sup><sub>3</sub>)<sub>2</sub> (140 mg, 0.0789 mmol) in CH<sub>2</sub>Cl<sub>2</sub> (10 mL) was treated with Me<sub>3</sub>NO (7.1 mg, 0.0946 mmol) in 2 mL of CH<sub>2</sub>Cl<sub>2</sub> and immediately frozen by inserting the tube into liquid nitrogen. The headspace was evacuated and refilled with 40 psig of H<sub>2</sub>, and the solution was thawed. After stirring this mixture for 2 h, solvent was removed and the residue was extracted into Et<sub>2</sub>O. The extract was filtered through Celite and the solvent removed under vacuum. <sup>19</sup>F NMR analysis showed ~50% of signals product. The crude sample was dissolved in 10 mL of CH<sub>2</sub>Cl<sub>2</sub> and treated with excess Et<sub>4</sub>NCl (131 mg, 0.789 mmol). The solvent was removed under vacuum, and the product was extracted into 10 mL Et<sub>2</sub>O. The mixture was filtered through Celite, and the filtrate was dried under vacuum. The solid was dissolved in a minimal amount of THF and loaded onto a column of neutral alumina (Brockmann Level IV) eluting THF. The first

red band was discarded, and the remaining brown band was eluted with  $\text{CH}_2\text{Cl}_2$ . The solution was concentrated to 5 mL, layered with 20 mL of pentane, and cooled to  $-30\text{ }^\circ\text{C}$  precipitating an oil. Upon storing under vacuum, the oil converted to a solid. The solid recrystallized from 5 mL of  $\text{CH}_2\text{Cl}_2$ , layered with 20 mL of pentane and cooled in a  $-30\text{ }^\circ\text{C}$ , yielding red crystals (49 mg, 33%).

**Synthesis of  $\text{HNMe}_3\text{BAR}^{\text{F}24}$ .**  $\text{Me}_3\text{N}\cdot\text{HCl}$  (54 mg, 0.56 mmol) and  $\text{NaBAR}^{\text{F}24}$  (500 mg, 0.56 mmol) were dissolved in  $\text{CH}_2\text{Cl}_2$  (40 mL) and stirred for 10 min. The solvent was removed under vacuum forming an off-white solid. The product was extracted into  $\text{Et}_2\text{O}$  (40 mL), passed through Celite, and the solvent was removed under vacuum. The product was crystallized from  $\text{CH}_2\text{Cl}_2$  and hexanes at  $0\text{ }^\circ\text{C}$ . Yield 0.44 g (84%).  $^1\text{H NMR}$  ( $\text{CD}_2\text{Cl}_2$ ): 7.72 (s, 8H); 7.57 (s, 4H); 6.38 (t, 2H,  $\text{HN}(\text{CH}_3)_3$ ,  $J_{\text{NH}} = 55\text{ Hz}$ ); 3.05 (d, 9H,  $\text{HN}(\text{CH}_3)_3$ ).

**Synthesis of Pyrrolidinium  $\text{BAR}^{\text{F}24}$  ( $\text{Pyr}\cdot\text{HBAR}^{\text{F}24}$ ).** Pyrrolidine (64 mg, 9.0 mmol) was dissolved in  $\text{CH}_2\text{Cl}_2$  (10 mL) and treated with  $\text{HBF}_4\cdot\text{Et}_2\text{O}$  (1.3 mL, 9.0 mmol) and stirred for 30 minutes. The solvent was removed under vacuum producing a white powder. The solid was washed with pentane (20 mL) and  $\text{Et}_2\text{O}$  (20 mL) and dried under vacuum. Yield 1.32 g (92%).  $[\text{Pyrrolidinium}]\text{BF}_4$  (36 mg, 0.226 mmol) and  $\text{NaBAR}^{\text{F}24}$  (200 mg, 0.226 mmol) were combined and dissolved in  $\text{CH}_2\text{Cl}_2$  (40 mL) and let stir for 1 h. The solvent was removed under vacuum, producing an oil. An ether extract of this oil (10 mL) was passed through Celite, and the solvent was removed under vacuum. The resulting oil was triturated with pentane producing an off-white solid. The solid was dissolved in  $\text{CH}_2\text{Cl}_2$  (5 mL), layered with pentane (20 mL) and cooled to  $0\text{ }^\circ\text{C}$  yielding white crystals (0.19 g, 90%).  $^1\text{H NMR}$  ( $\text{CD}_2\text{Cl}_2$ ): 7.72 (s, 8H); 7.57 (s, 4H); 6.14 (t, 2H,  $\text{H}_2\text{N}$ ,  $J_{\text{NH}} = 53\text{ Hz}$ ); 3.58 (s, 4H,  $\text{N}(\text{CH}_2)_2(\text{CH}_2)_2$ ); 2.20 (s, 4H,  $\text{N}(\text{CH}_2)_2(\text{CH}_2)_2$ ).

**Synthesis of  $[\text{PhNH}_3]\text{BAR}^{\text{F}24}\cdot 2\text{Et}_2\text{O}$ .**  $[\text{PhNH}_3]\text{BF}_4$  (41 mg, 0.226 mmol) was dissolved in MeCN (5 mL) and this solution was treated with a solution of  $\text{NaBAR}^{\text{F}24}$  (200 mg, 0.226 mmol) in MeCN (5 mL). The mixture was stirred for 10 min, followed by removal of the solvent. The product was extracted into  $\text{Et}_2\text{O}$  (10 mL) and passed through Celite, and the filtrate was dried under vacuum. The resulting off-white solid was dissolved in  $\text{CH}_2\text{Cl}_2$ , layered with pentane, and cooled to  $-30\text{ }^\circ\text{C}$ , yielding white crystals (210 mg, 83%). Two molecules of  $\text{Et}_2\text{O}$  were found by  $^1\text{H NMR}$  and were not able to be removed even after drying the sample under vacuum for 24 h.  $^1\text{H NMR}$  ( $\text{CD}_2\text{Cl}_2$ ): 8.69 (br, 3H,  $\text{H}_3\text{NPh}$ ); 7.72 (s, 8H); 7.63-7.61 (m, 3H,  $\text{H}_3\text{NPh}$ ); 7.56 (s, 4H); 7.35-7.33 (m, 2H,  $\text{H}_3\text{NPh}$ ); 3.57 (m, 8H,  $(\text{CH}_3\text{CH}_2)_2\text{O}$ ); 1.17 (m, 12H,  $(\text{CH}_3\text{CH}_2)_2\text{O}$ ).

**Titration of  $\text{Et}_4\text{N}[\text{H}3(\text{BAR}^{\text{F}3})_2]$  with  $\text{HNMe}_3\text{BAR}^{\text{F}24}$ .** A sample of  $\text{Et}_4\text{N}[\text{H}3(\text{BAR}^{\text{F}3})_2]$  (2.6 mg, 0.0014 mmol) was dissolved in 1 mL of  $\text{CD}_2\text{Cl}_2$ . A standard solution of  $\text{HNMe}_3\text{BAR}^{\text{F}24}$  was prepared by dissolving 130 mg of  $\text{HNMe}_3\text{BAR}^{\text{F}24}$  (0.14 mmol) in 1 mL of  $\text{CD}_2\text{Cl}_2$  (0.14 M). A  $^1\text{H NMR}$  spectrum was collected before addition of  $\text{HNMe}_3\text{BAR}^{\text{F}24}$  and after each addition. The sample was kept cold between acquisitions to prevent decomposition and warmed to room temperature immediately prior to recording the  $^1\text{H NMR}$  spectrum.

**Titration of  $\text{Et}_4\text{N}[\text{H}4(\text{BAR}^{\text{F}3})_2]$  with  $\text{Pyr}\cdot\text{HBAR}^{\text{F}24}$ .** A sample of  $\text{Et}_4\text{N}[\text{H}4(\text{BAR}^{\text{F}3})_2]$  (2.5 mg, 0.0013 mmol) was placed in a J Young NMR tube and dissolved in 0.9 mL of  $\text{CD}_2\text{Cl}_2$ . A standard

solution of  $\text{Pyr}\cdot\text{HBAr}^{\text{F}24}$  was prepared by dissolving 62 mg of  $\text{Pyr}\cdot\text{HBAr}^{\text{F}24}$  (0.067 mmol) in 1 mL of  $\text{CD}_2\text{Cl}_2$  (0.067 M). A  $^1\text{H}$  NMR spectrum was collected before addition of  $\text{Pyr}\cdot\text{HBAr}^{\text{F}24}$  and after each addition. The sample was kept cold between acquisitions to prevent decomposition and warmed to room temperature immediately prior to recording the  $^1\text{H}$  NMR spectrum.

**Production of  $\text{H}_2$  by protonation of  $\text{Et}_4\text{N}[\text{H}_3(\text{BAr}^{\text{F}}_3)_2]$  with  $\text{PhNH}_3\text{BAr}^{\text{F}24}\cdot 2\text{Et}_2\text{O}$ .** Three vials were loaded with a known amount of  $\text{Et}_4\text{N}[\text{H}_3(\text{BAr}^{\text{F}}_3)_2]$  (~3 mg) and 0.5 mL of  $\text{CH}_2\text{Cl}_2$  and sealed with a rubber septum. A stock solution of acid was prepared from  $\text{PhNH}_3\text{BAr}^{\text{F}24}\cdot 2\text{Et}_2\text{O}$  (60 mg, 0.0054 mmol) in 1.75 mL of  $\text{CH}_2\text{Cl}_2$ . An aliquot of 0.5 mL of stock solution of acid was injected through the septum, resulting in a color change of the solution from brown to orange. An internal standard of 100  $\mu\text{L}$  of  $\text{CH}_4$  was injected through the septum into the headspace of the vial. Each vial was allowed to stir for at least 30 minutes before the headspace was analyzed by gas chromatography.

**Table S1.** IR and  $^{31}\text{P}$  NMR Signals for Dicarbonyl Complexes **1** and **2** and Their bis- $\text{BAr}^{\text{F}}_3$  Adducts and Isomers Thereof ( $\text{CH}_2\text{Cl}_2$  solution).

| Compound                                                                                                                                                           | $\nu_{\text{CN}}$ ( $\text{cm}^{-1}$ ) | $\nu_{\text{CO}}$ ( $\text{cm}^{-1}$ ) | $^{31}\text{P}$ NMR (ppm)                |
|--------------------------------------------------------------------------------------------------------------------------------------------------------------------|----------------------------------------|----------------------------------------|------------------------------------------|
| $(\text{CO})_2(\text{CN})_2\text{Fe}(\text{pdt})\text{Ni}(\text{dppe})$ ( <b>1</b> )<br>cis-CO, trans-CN                                                           | 2110, 2081                             | 2053, 2005                             | 56.9                                     |
| $(\text{CO})_2(\text{CN})_2\text{Fe}(\text{pdt})\text{Ni}(\text{dcpe})$ ( <b>2</b> )<br>cis-CO, trans-CN                                                           | 2113, 2090                             | 2045, 1995                             | 66.3                                     |
| isomer of <b>2</b><br>cis-CO, cis-CN                                                                                                                               | 2120                                   | 2033, 1982                             | 67.8, 66.5<br>( $J_{\text{PP}} = 33$ Hz) |
| $(\text{CO})_2(\text{CNBAr}^{\text{F}}_3)_2\text{Fe}(\text{pdt})\text{Ni}(\text{dppe})$ [ <b>1</b> ( $\text{BAr}^{\text{F}}_3$ ) <sub>2</sub> ]<br>cis-CO trans-CN | 2194, 2166                             | 2088, 2050                             | 56.4                                     |
| <b>1</b> ( $\text{BAr}^{\text{F}}_3$ ) <sub>2</sub><br>trans-CO, cis-CN                                                                                            | 2215, 2201                             | 2087 (w), 2030                         | 58.7                                     |
| <b>1</b> ( $\text{BAr}^{\text{F}}_3$ ) <sub>2</sub><br>cis-CO, cis-CN                                                                                              | 2214, 2202                             | 2070, 2020                             | 58.9, 58.5<br>( $J_{\text{PP}} = 37$ Hz) |
| $(\text{CO})_2(\text{CNBAr}^{\text{F}}_3)_2\text{Fe}(\text{pdt})\text{Ni}(\text{dcpe})$ [ <b>2</b> ( $\text{BAr}^{\text{F}}_3$ ) <sub>2</sub> ]<br>cis-CO trans-CN | 2190, 2149                             | 2085, 2046                             | 69.8                                     |
| <b>2</b> ( $\text{BAr}^{\text{F}}_3$ ) <sub>2</sub><br>trans-CO, cis-CN                                                                                            | 2214, 2200                             | 2084 (w), 2027                         | 75.1                                     |
| <b>2</b> ( $\text{BAr}^{\text{F}}_3$ ) <sub>2</sub><br>cis-CO, cis-CN                                                                                              | 2210                                   | 2068, 2030                             | 70.2, 69.5<br>( $J_{\text{PP}} = 30$ Hz) |

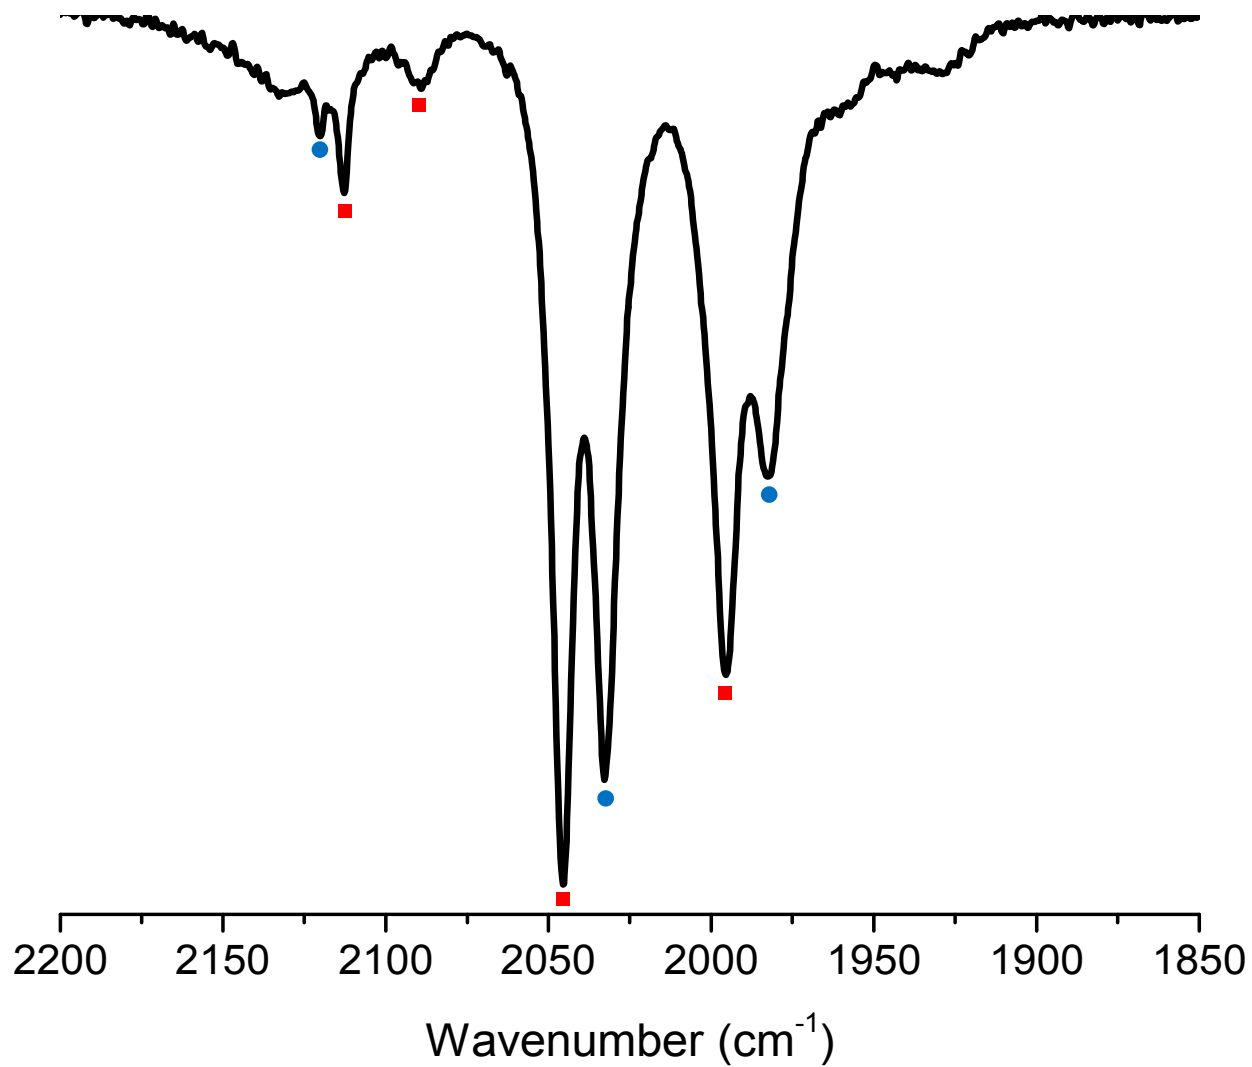

**Figure S1.** IR spectrum of cis-CO/trans-CN(■) and cis-CO/trans-CN(●) isomers of **2** in CH<sub>2</sub>Cl<sub>2</sub> solution. The second expected  $\nu_{\text{CN}}$  for the cis-CO/cis-CN isomer is obscured.

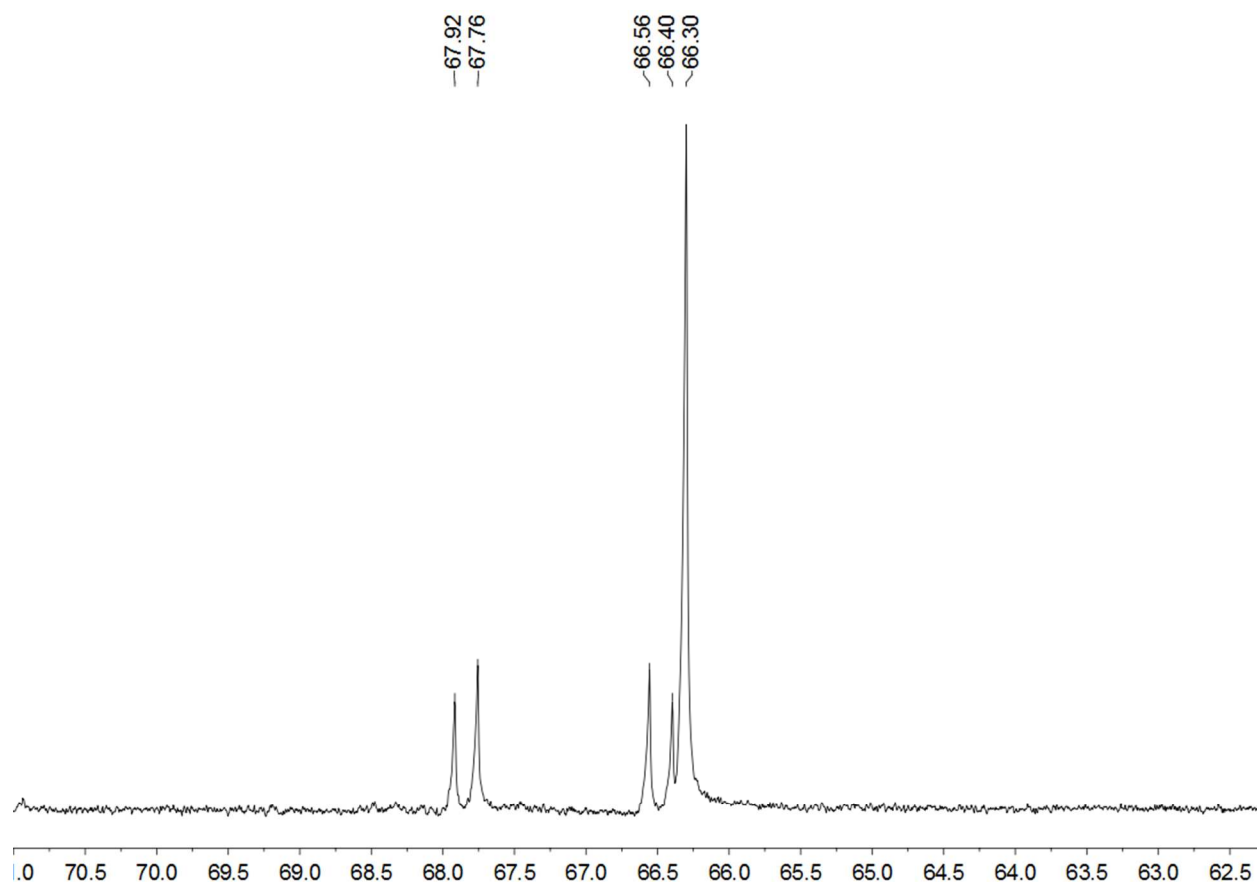

**Figure S2.**  $^{31}\text{P}$  NMR spectrum of the cis-CO/trans-CN and cis-CO/trans-CN isomers of **2** in a  $\text{CD}_2\text{Cl}_2$  solution.



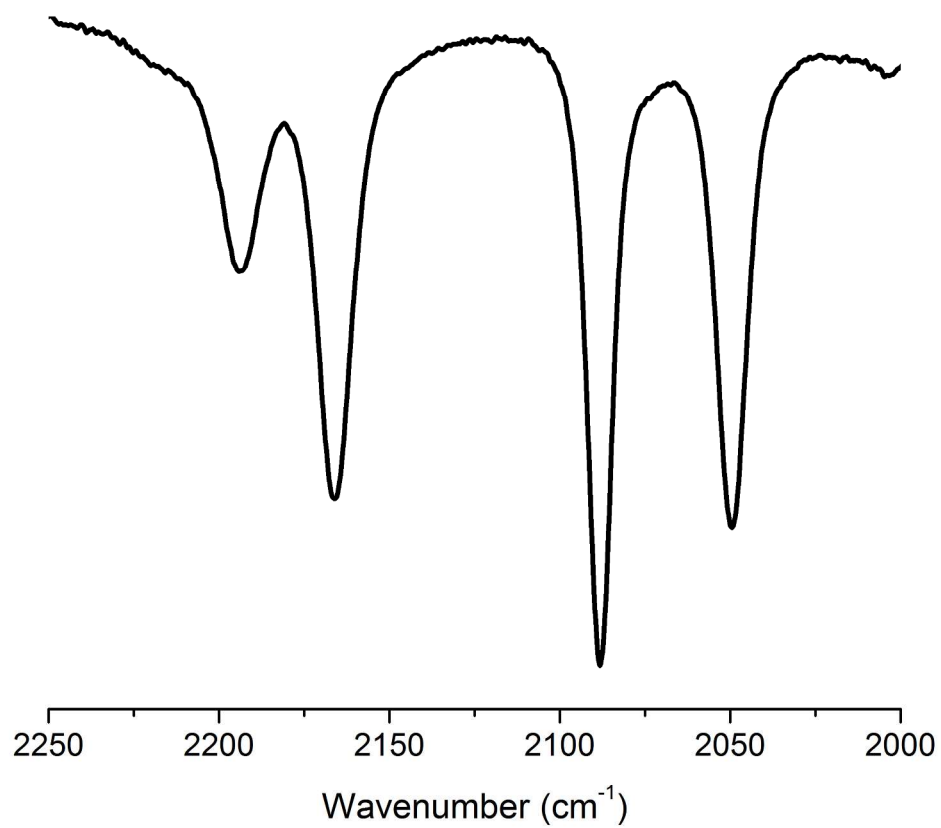

**Figure S3.** IR spectrum of the cis-CO/trans-CN isomer of  $1(\text{BAr}^{\text{F}_3})_2$  in a  $\text{CH}_2\text{Cl}_2$  solution.

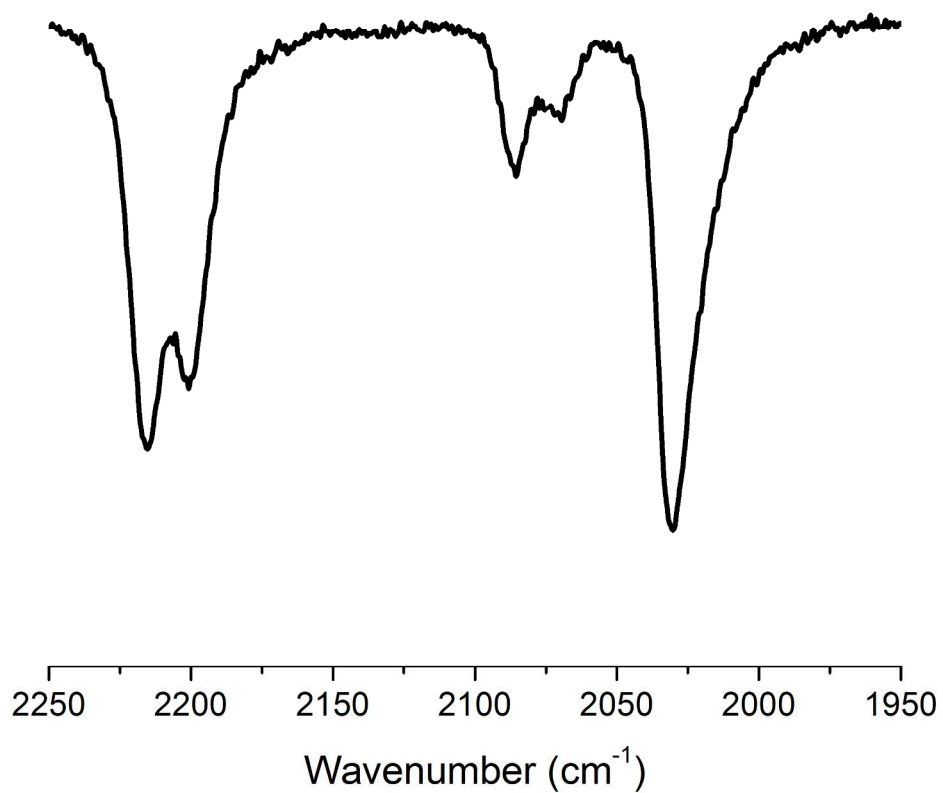

**Figure S4.** IR spectrum of  $1(\text{BAr}^{\text{F}}_3)_2$  in  $\text{CH}_2\text{Cl}_2$  solution (trans-CO/cis-CN isomer). An impurity of the cis-CO/cis-CN isomer indicated by the  $\nu_{\text{CO}}$  band at  $2070 \text{ cm}^{-1}$ .

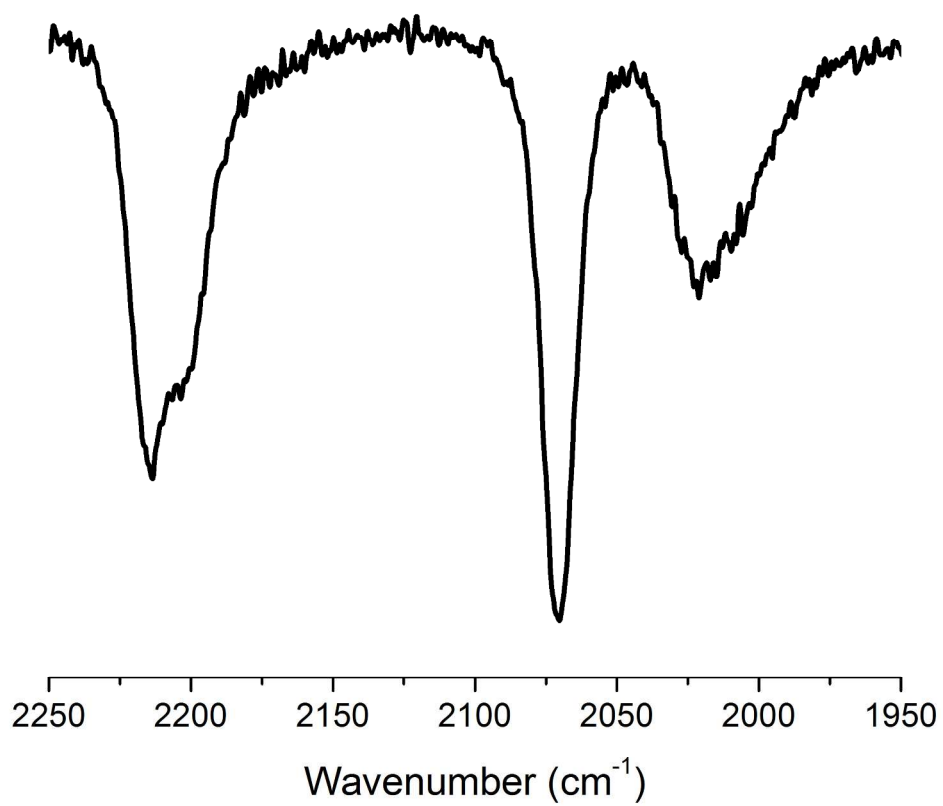

**Figure S5.** IR spectrum of  $1(\text{BAr}^{\text{F}_3})_2$  in  $\text{CH}_2\text{Cl}_2$  solution (cis-CO/cis-CN isomer).

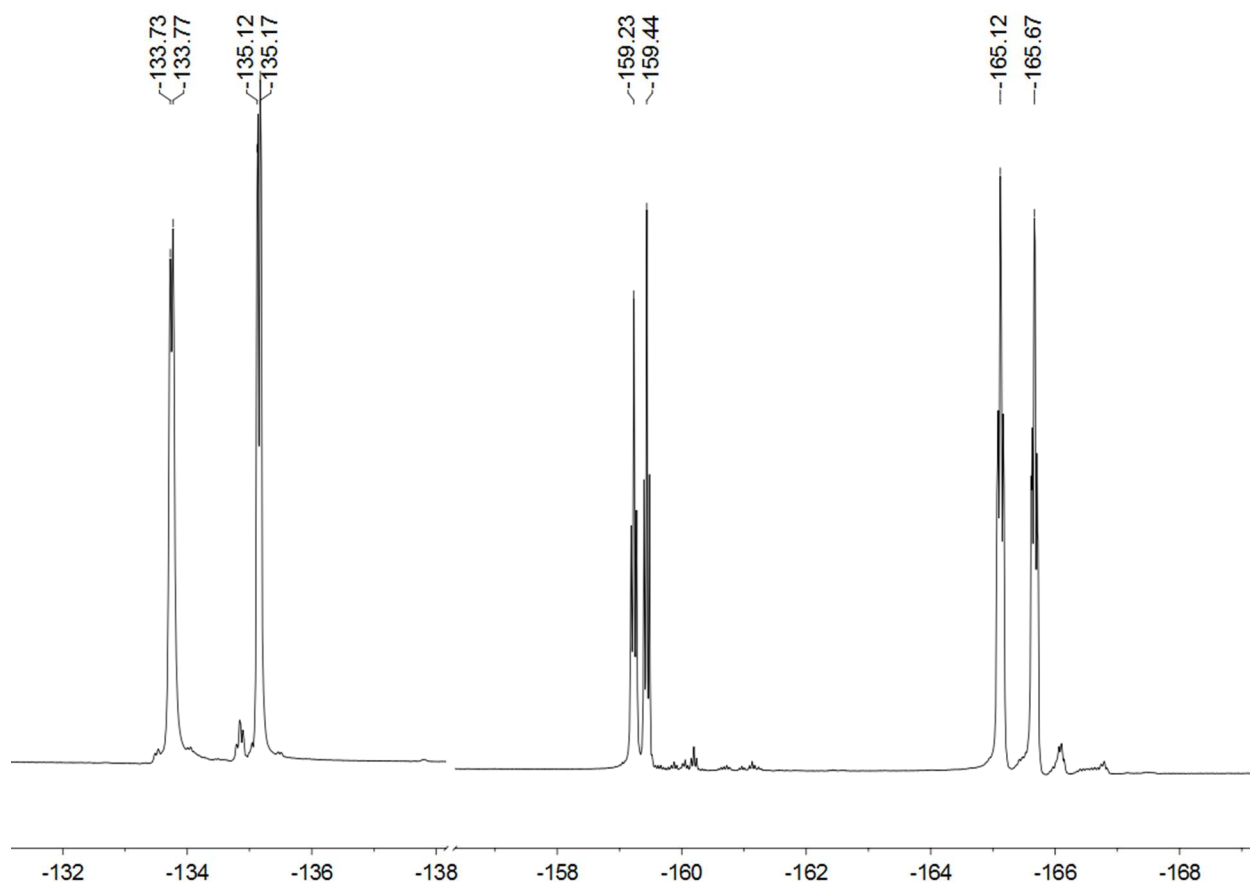

**Figure S6.**  $^{19}\text{F}$  NMR spectrum of the cis-CO/trans-CN isomer of  $\mathbf{1}(\text{BAr}^{\text{F}}_3)_2$  in a  $\text{CD}_2\text{Cl}_2$  solution.

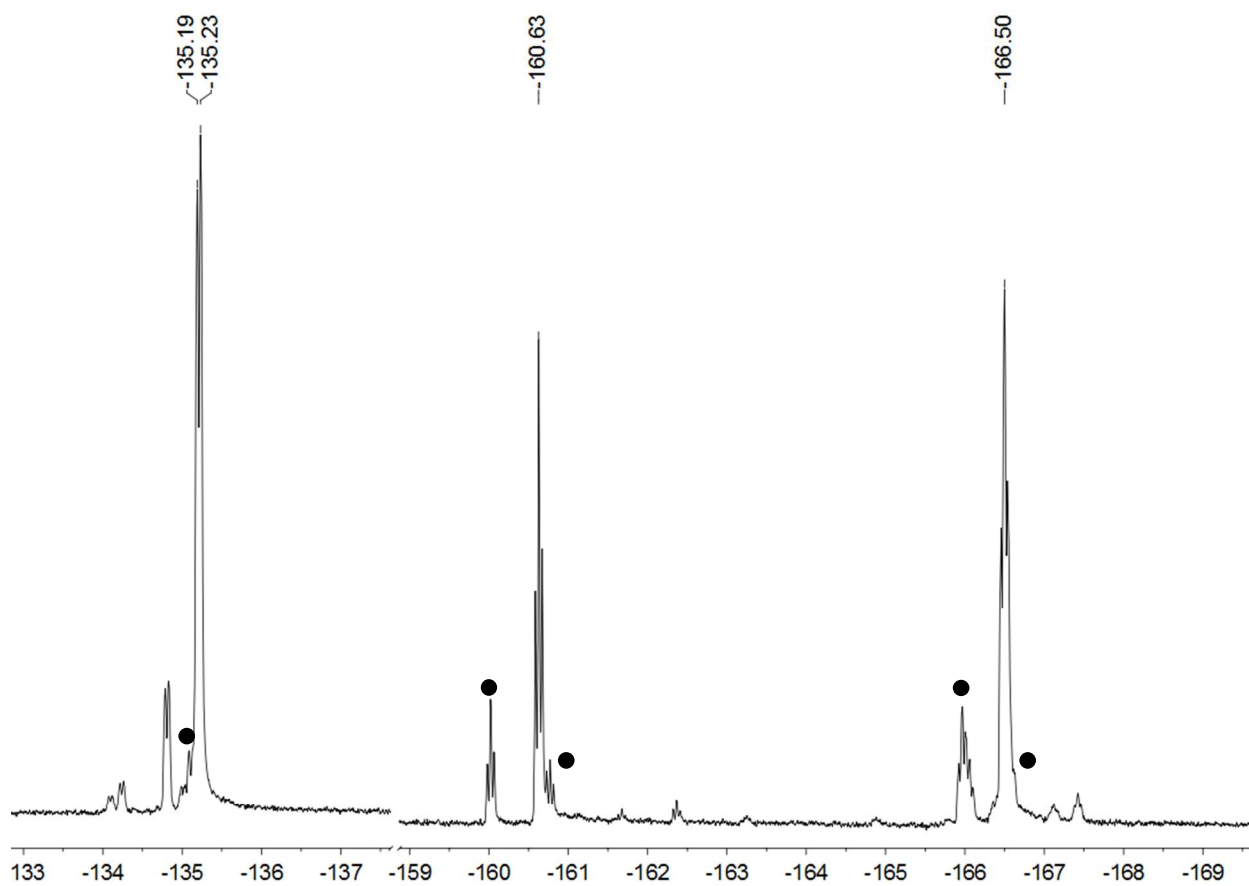

**Figure S7.**  $^{19}\text{F}$  NMR spectrum of  $1(\text{BAr}^{\text{F}_3})_2$  showing the presence of the cis-CO/trans-CN isomer. Signals for cis-CO/cis-CN isomer of  $1(\text{BAr}^{\text{F}_3})_2$  also observed (●).

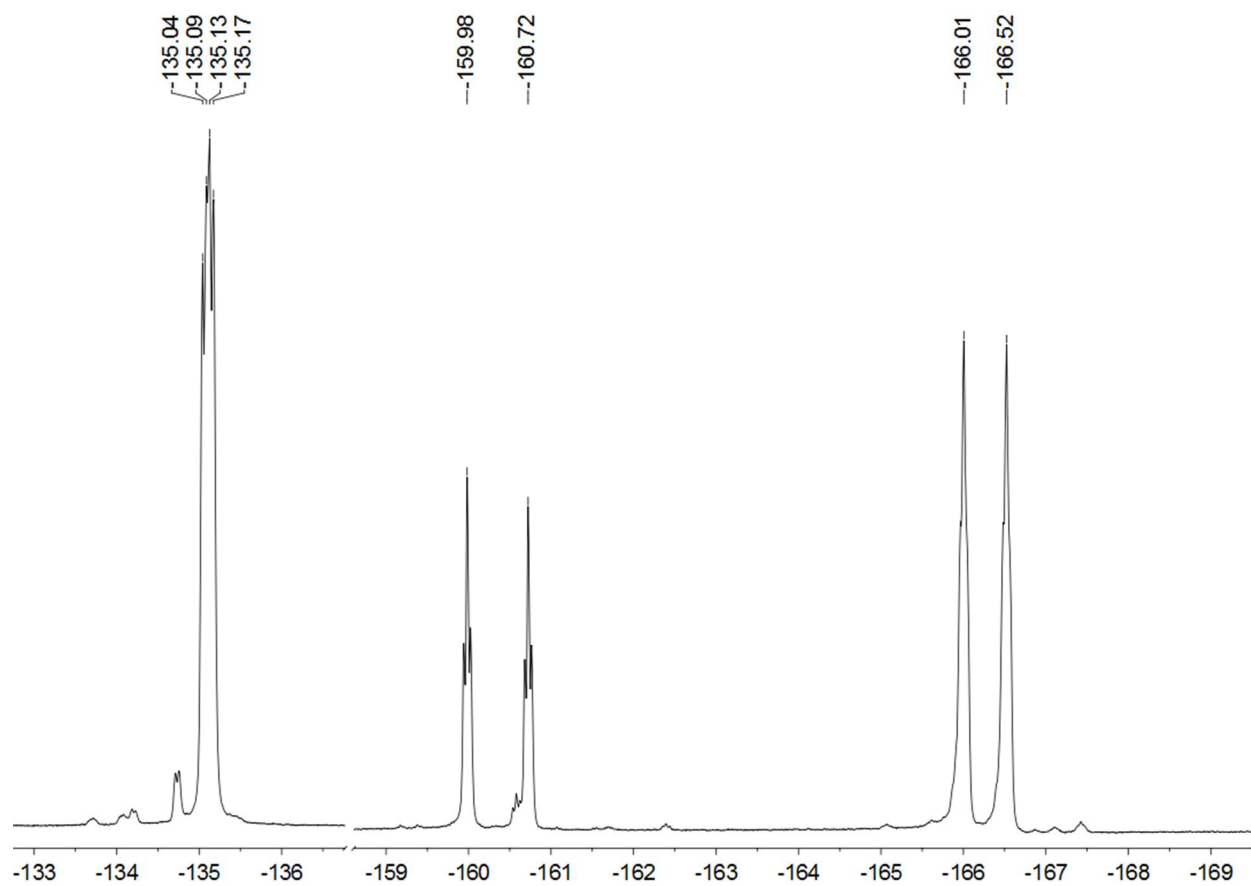

**Figure S8.**  $^{19}\text{F}$  NMR spectrum of  $1(\text{BAr}^{\text{F}_3})_2$  showing the presence of the cis-CO/trans-CN isomer.

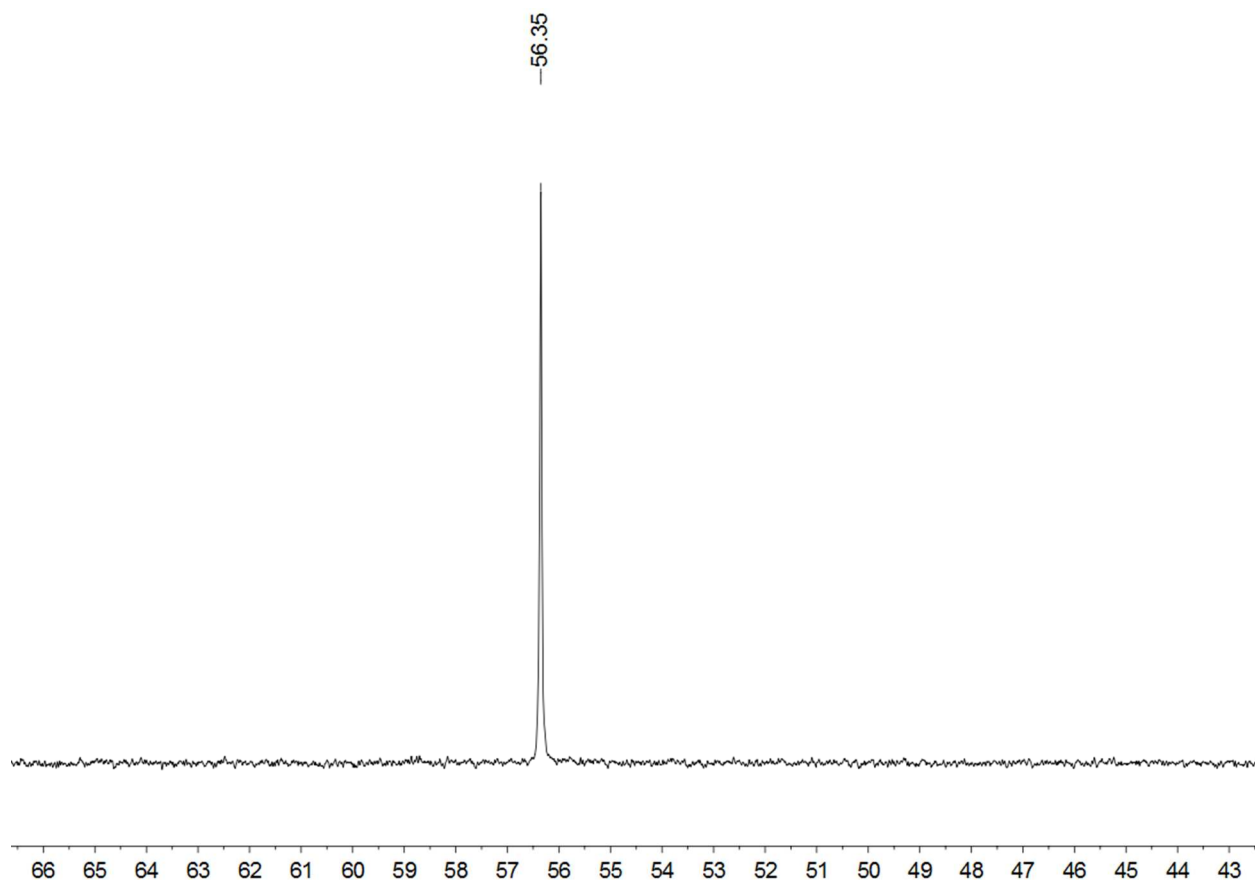

**Figure S9.**  $^{31}\text{P}$  NMR spectrum of cis-CO/trans-CN isomer of  $\mathbf{1}(\text{BAr}^{\text{F}}_3)_2$  in  $\text{CD}_2\text{Cl}_2$  solution.

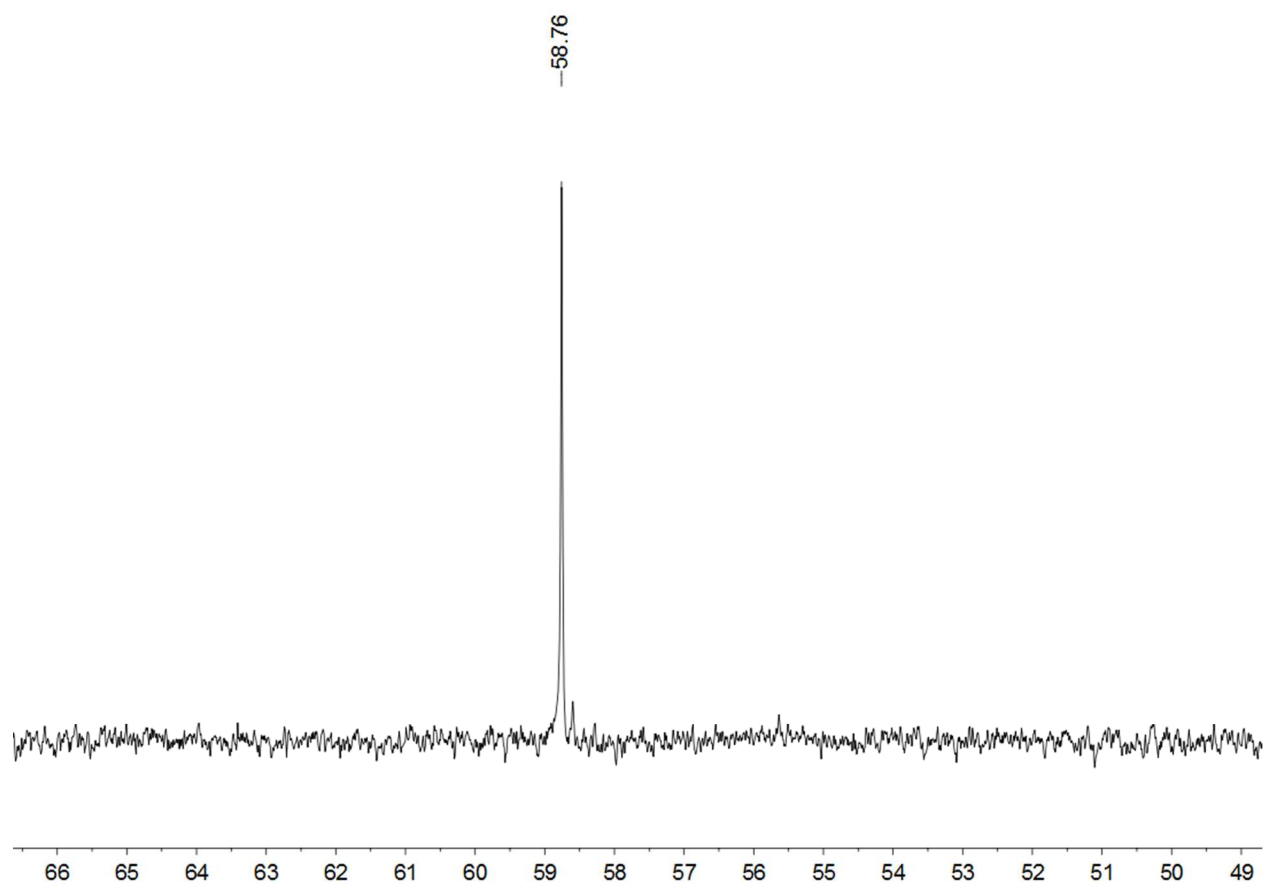

**Figure S10.**  $^{31}\text{P}$  NMR spectrum of trans-CO/cis-CN isomer of  $\mathbf{1}(\text{BAr}^{\text{F}}_3)_2$  in  $\text{CD}_2\text{Cl}_2$  solution.



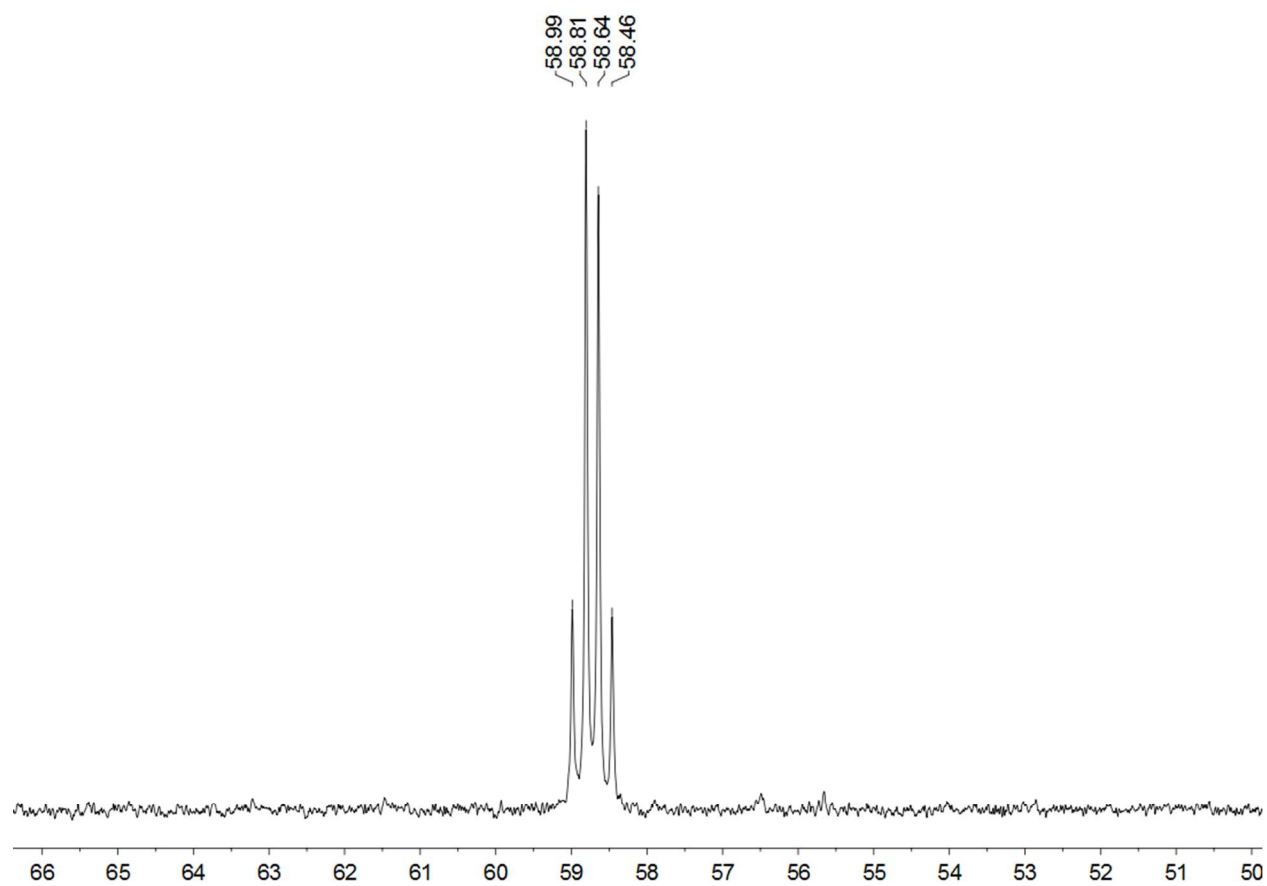

**Figure S11.**  $^{31}\text{P}$  NMR spectrum of cis-CO/cis-CN isomer of  $\mathbf{1}(\text{BAr}^{\text{F}}_3)_2$  in  $\text{CD}_2\text{Cl}_2$  solution.

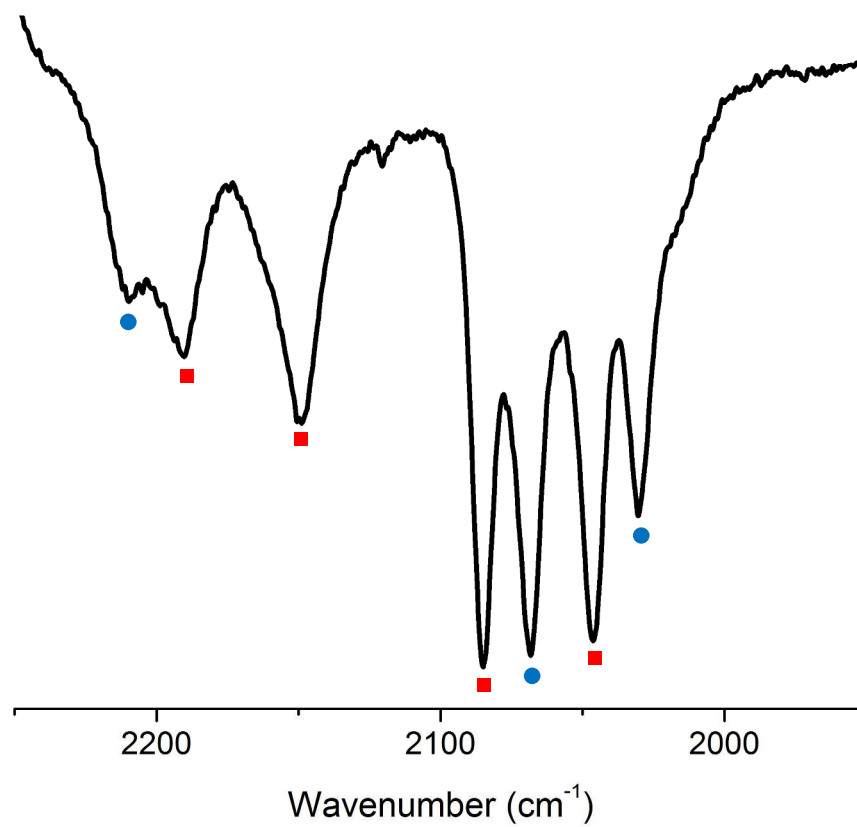

**Figure S12.** IR spectrum of cis-CO/trans-CN(■) and cis-CO/trans-CN(●) isomers of **2**(BArF<sub>3</sub>)<sub>2</sub> in CH<sub>2</sub>Cl<sub>2</sub> solution. A second  $\nu_{\text{CN}}$  band expected for the cis-CO/cis-CN isomer is not observed.

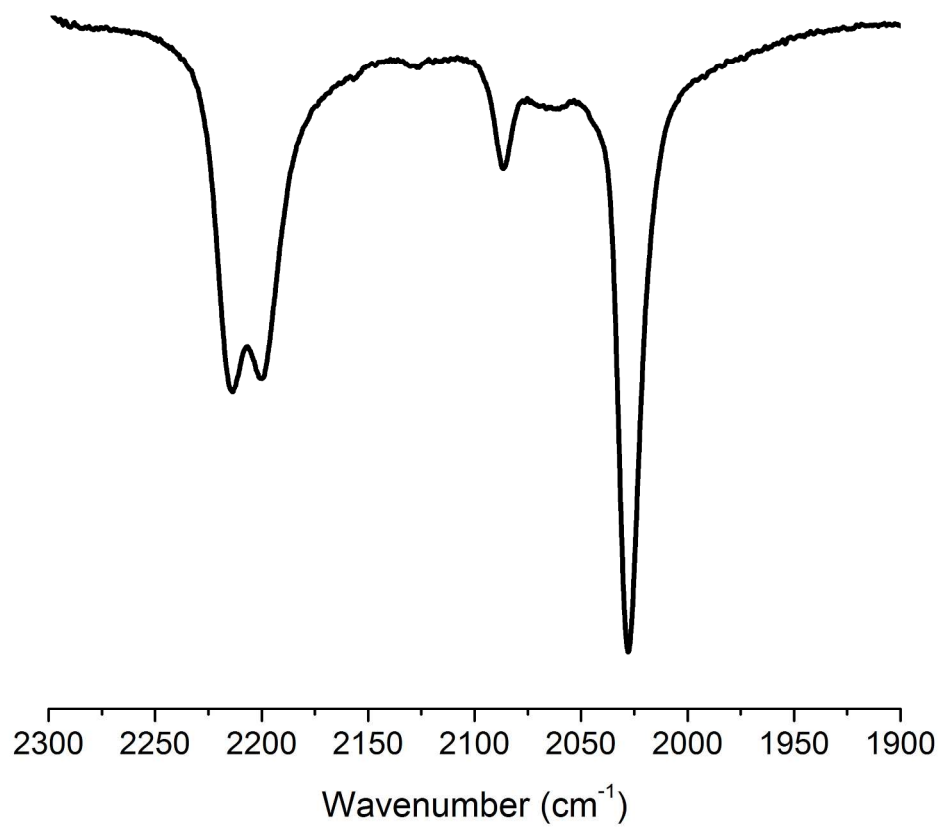

**Figure S13.** IR spectrum of trans-CO/cis-CN isomer of  $2(\text{BAr}^{\text{F}}_3)_2$  in  $\text{CH}_2\text{Cl}_2$  solution.

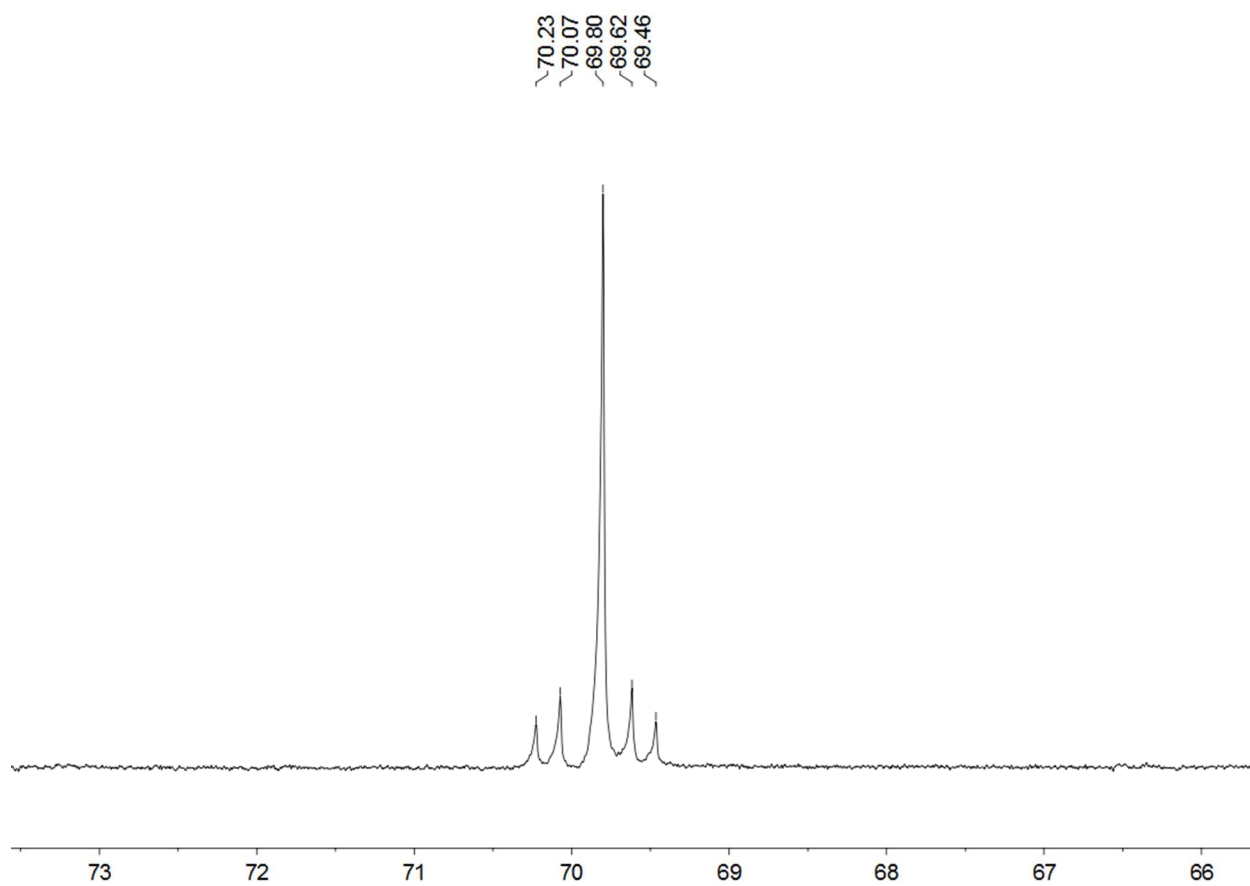

**Figure S14.**  $^{31}\text{P}$  NMR spectrum of trans-CO/cis-CN and cis-CO/cis-CN isomers of  $2(\text{BAr}^{\text{F}_3})_2$  in  $\text{CD}_2\text{Cl}_2$  solution.

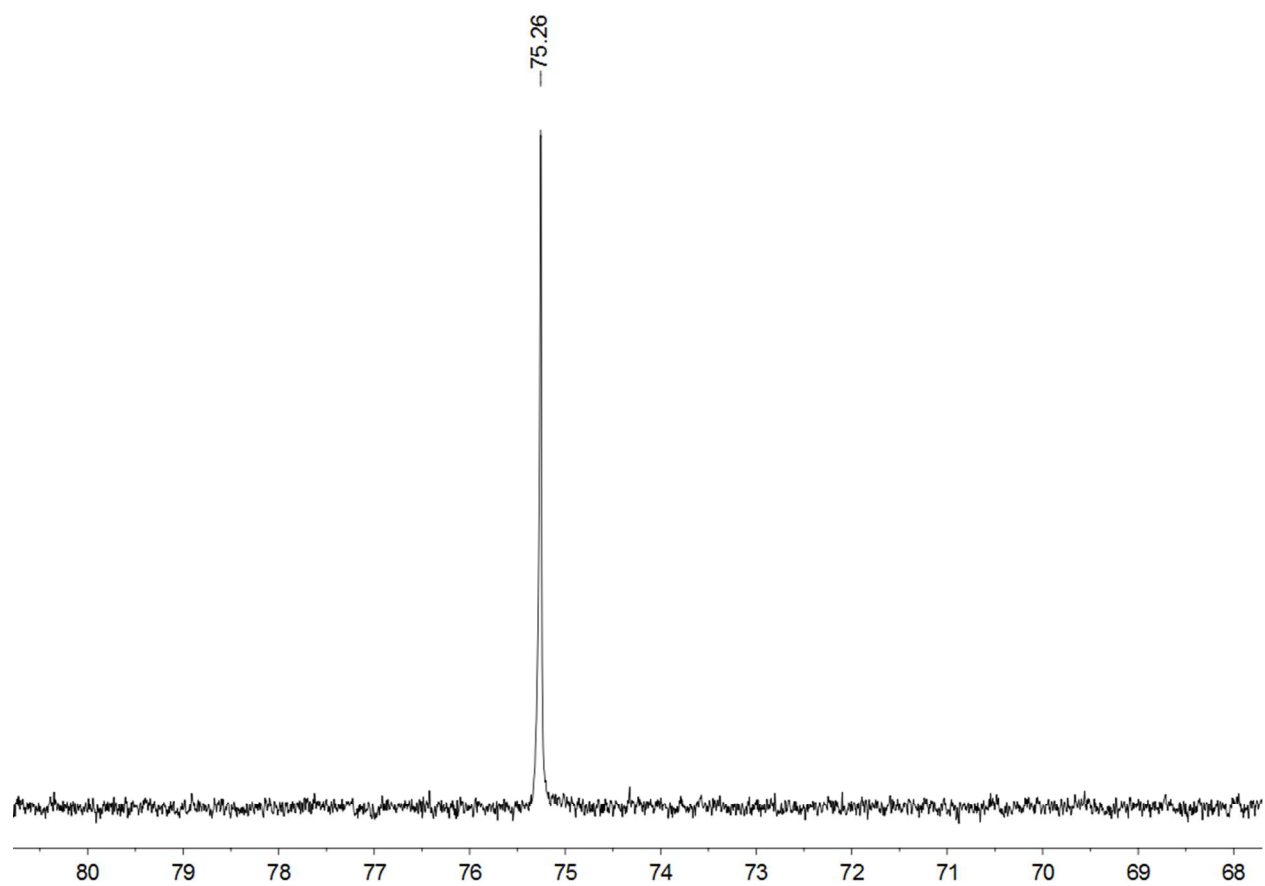

**Figure S15.**  $^{31}\text{P}$  NMR spectrum of cis-CO/trans-CN isomer of  $2(\text{BAr}^{\text{F}_3})_2$  in  $\text{CD}_2\text{Cl}_2$  solution.

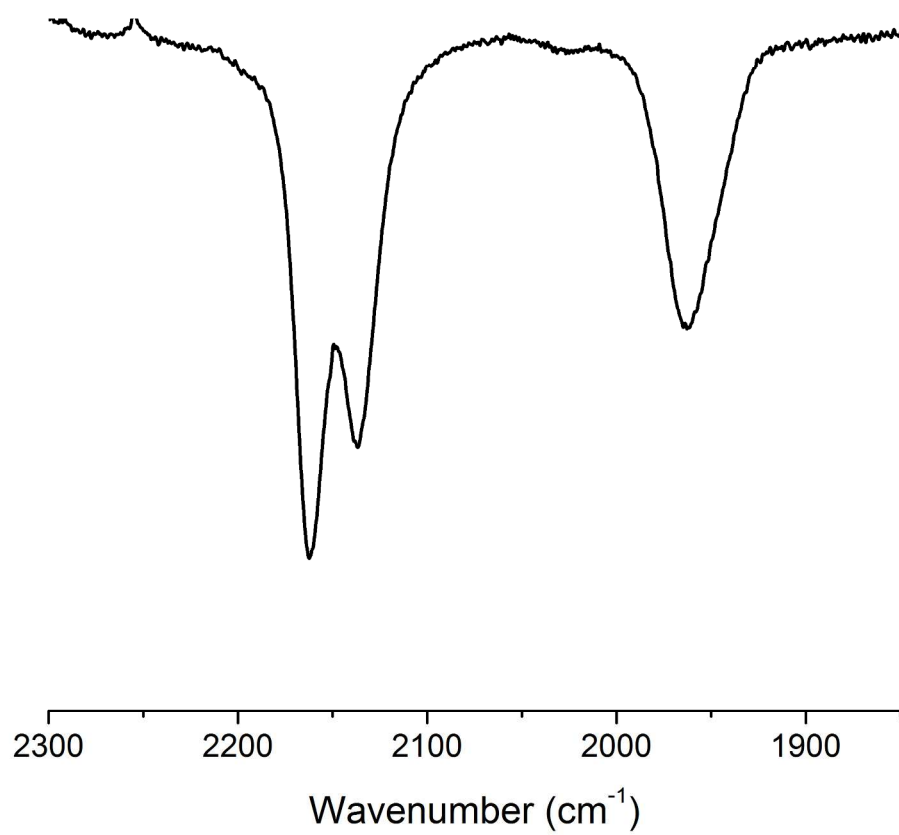

**Figure S16.** IR spectrum of Et<sub>4</sub>N[H<sub>3</sub>(BAr<sup>F</sup><sub>3</sub>)<sub>2</sub>] in CH<sub>2</sub>Cl<sub>2</sub> solution.

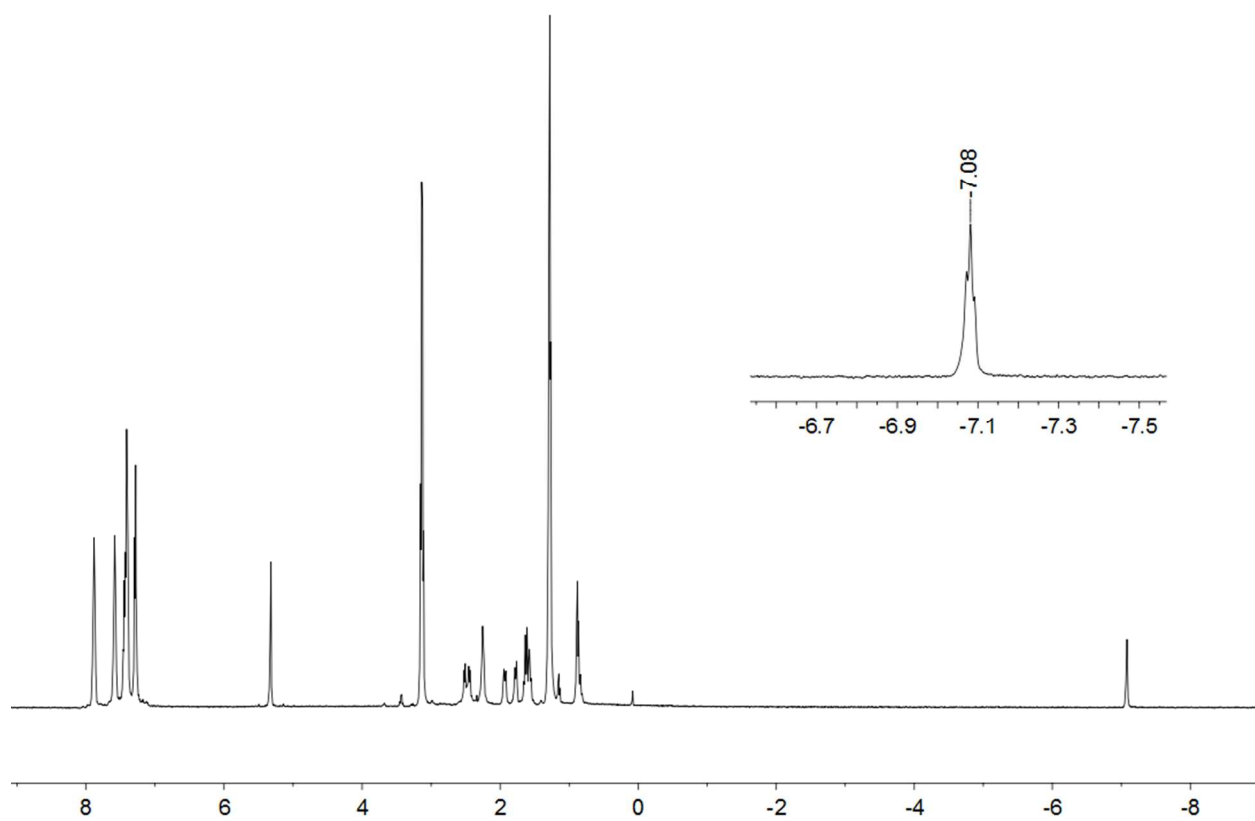

**Figure S17.**  $^1\text{H}$  NMR spectrum of  $\text{Et}_4\text{N}[\text{H}_3(\text{BAr}^{\text{F}_3})_2]$  in  $\text{CD}_2\text{Cl}_2$  solution.

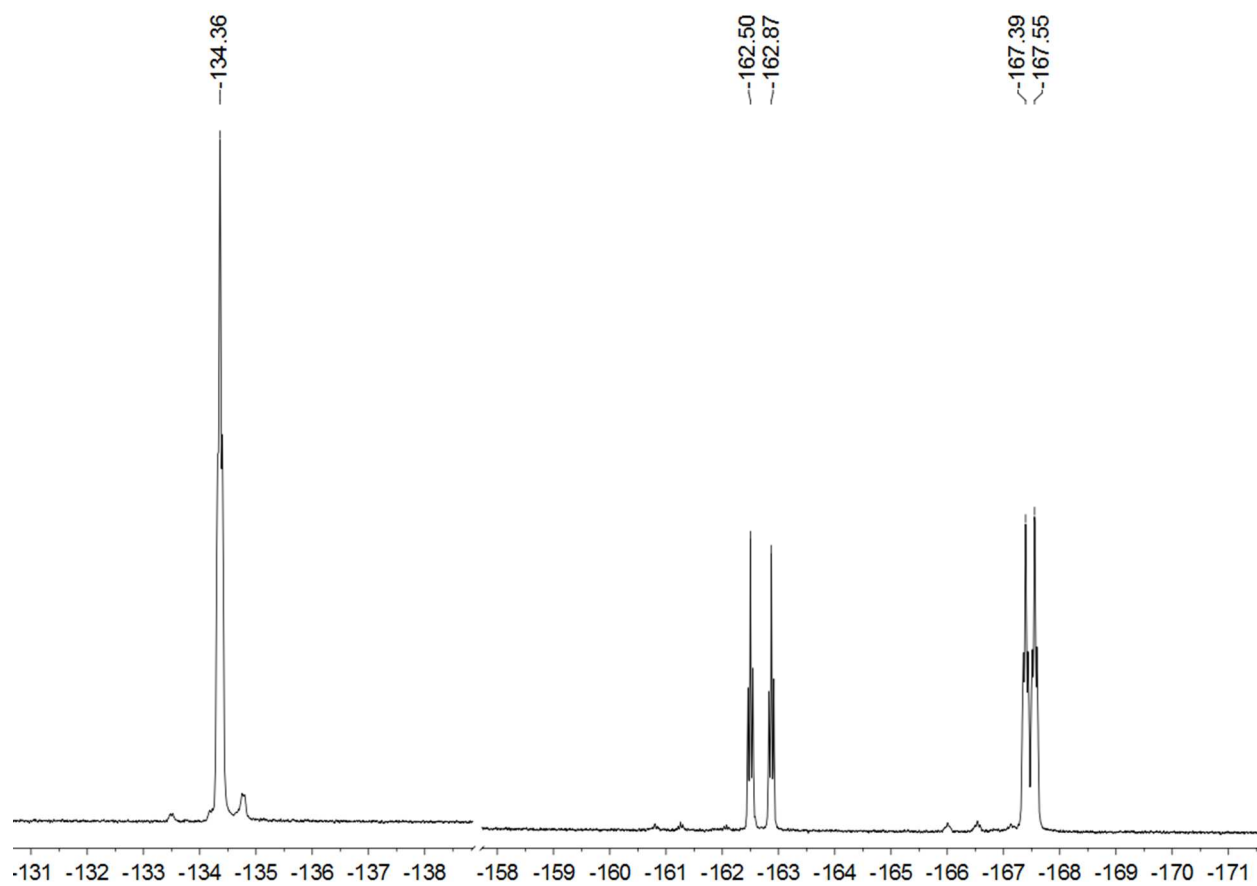

**Figure S18.**  $^{19}\text{F}$  NMR spectrum of  $\text{Et}_4\text{N}[\text{H}_3(\text{BAr}^{\text{F}_3})_2]$  in  $\text{CD}_2\text{Cl}_2$  solution.



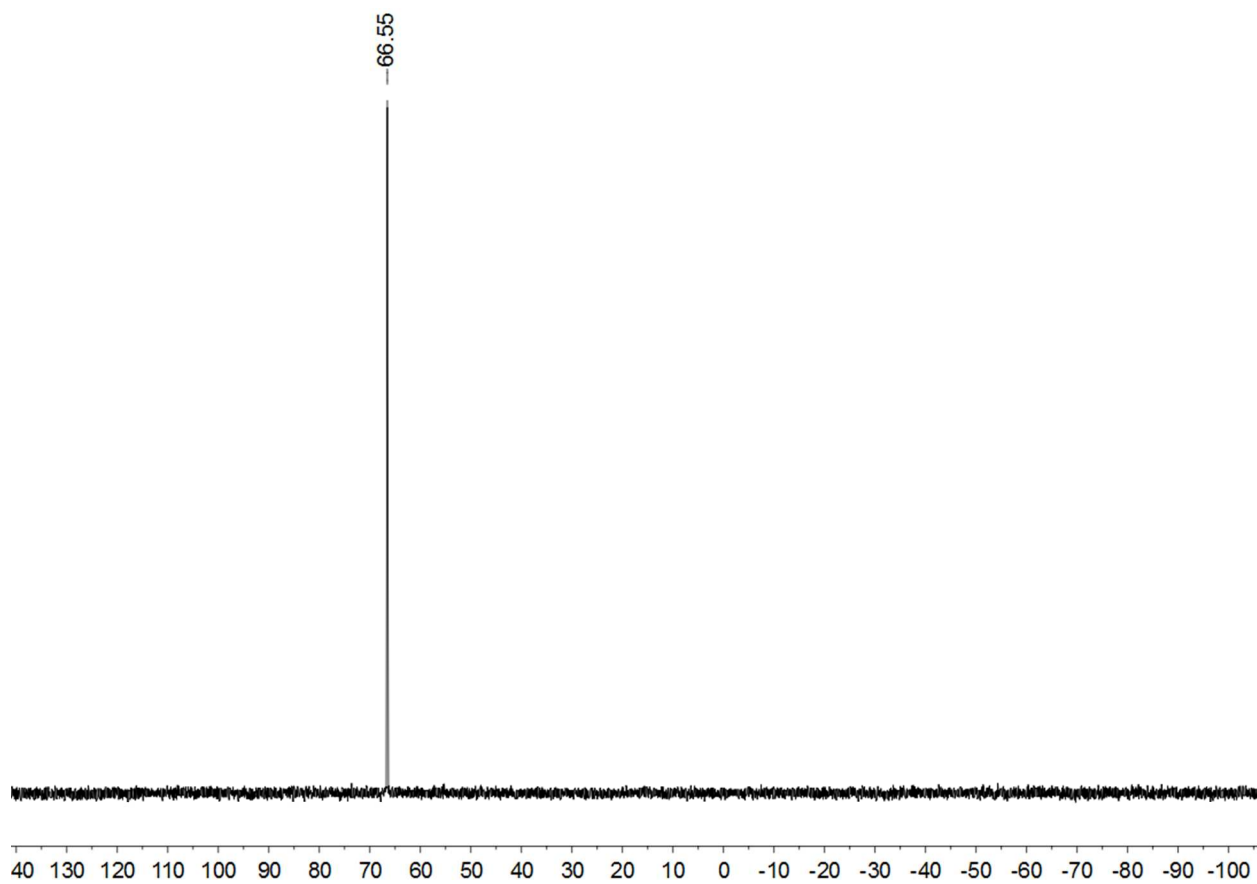

**Figure S19.**  $^{31}\text{P}$  NMR spectrum of  $\text{Et}_4\text{N}[\text{H}_3(\text{BAr}^{\text{F}_3})_2]$  in  $\text{CD}_2\text{Cl}_2$  solution.

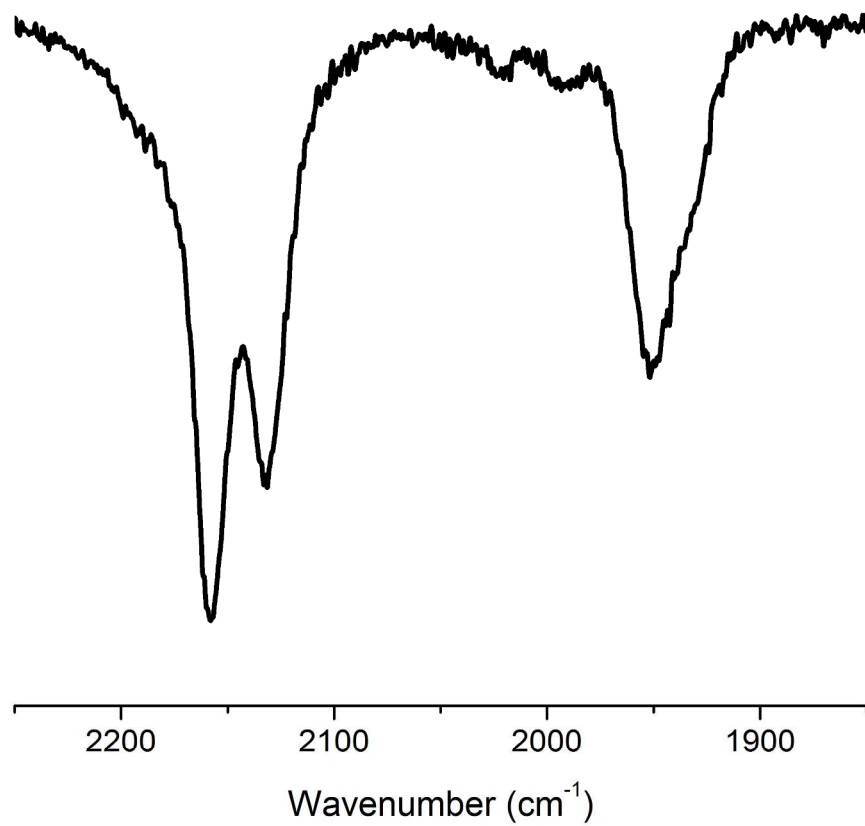

**Figure S20.** IR spectrum of Et<sub>4</sub>N[H<sub>4</sub>(BAr<sup>F</sup><sub>3</sub>)<sub>2</sub>] in CH<sub>2</sub>Cl<sub>2</sub> solution.

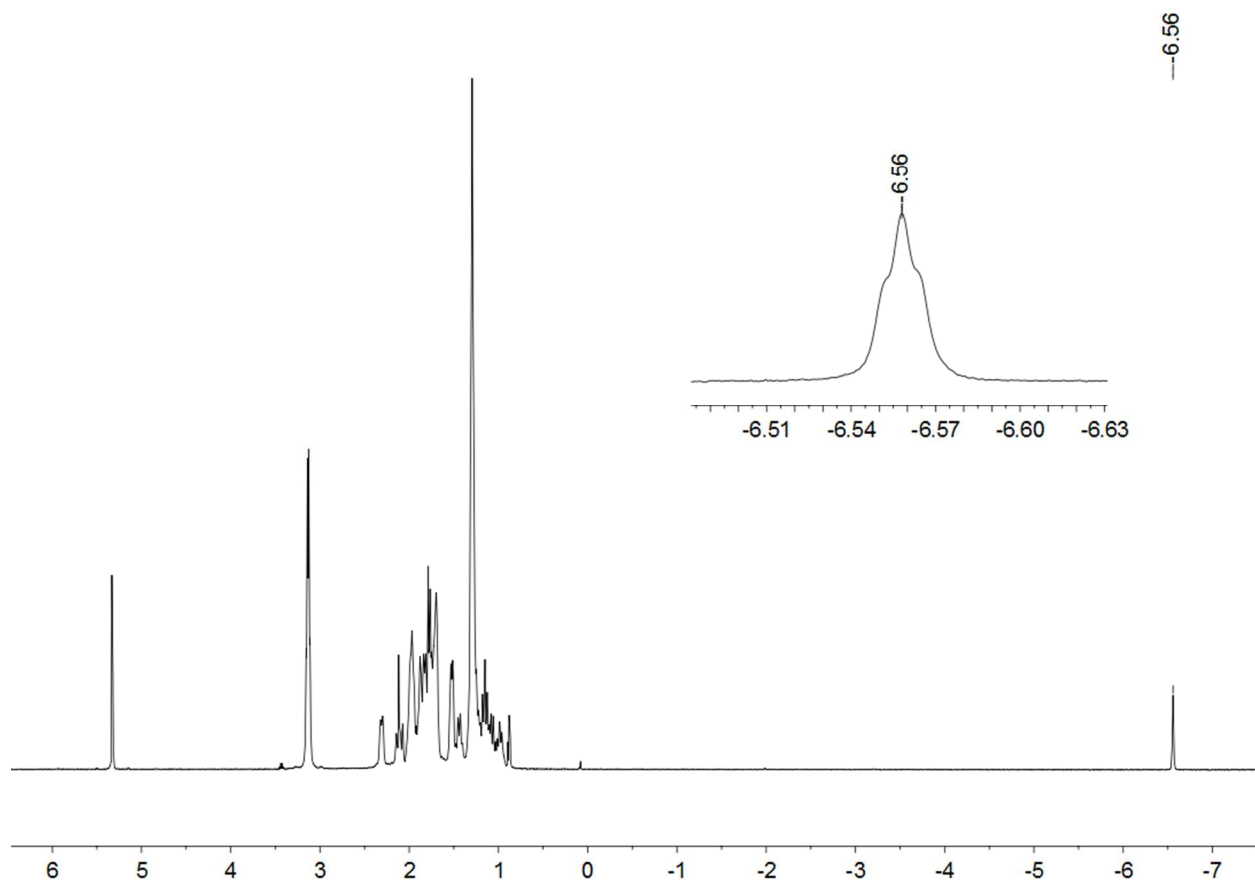

**Figure S21.**  $^1\text{H}$  NMR spectrum of  $\text{Et}_4\text{N}[\text{H}_4(\text{BAr}^{\text{F}_3})_2]$  in  $\text{CD}_2\text{Cl}_2$  solution.

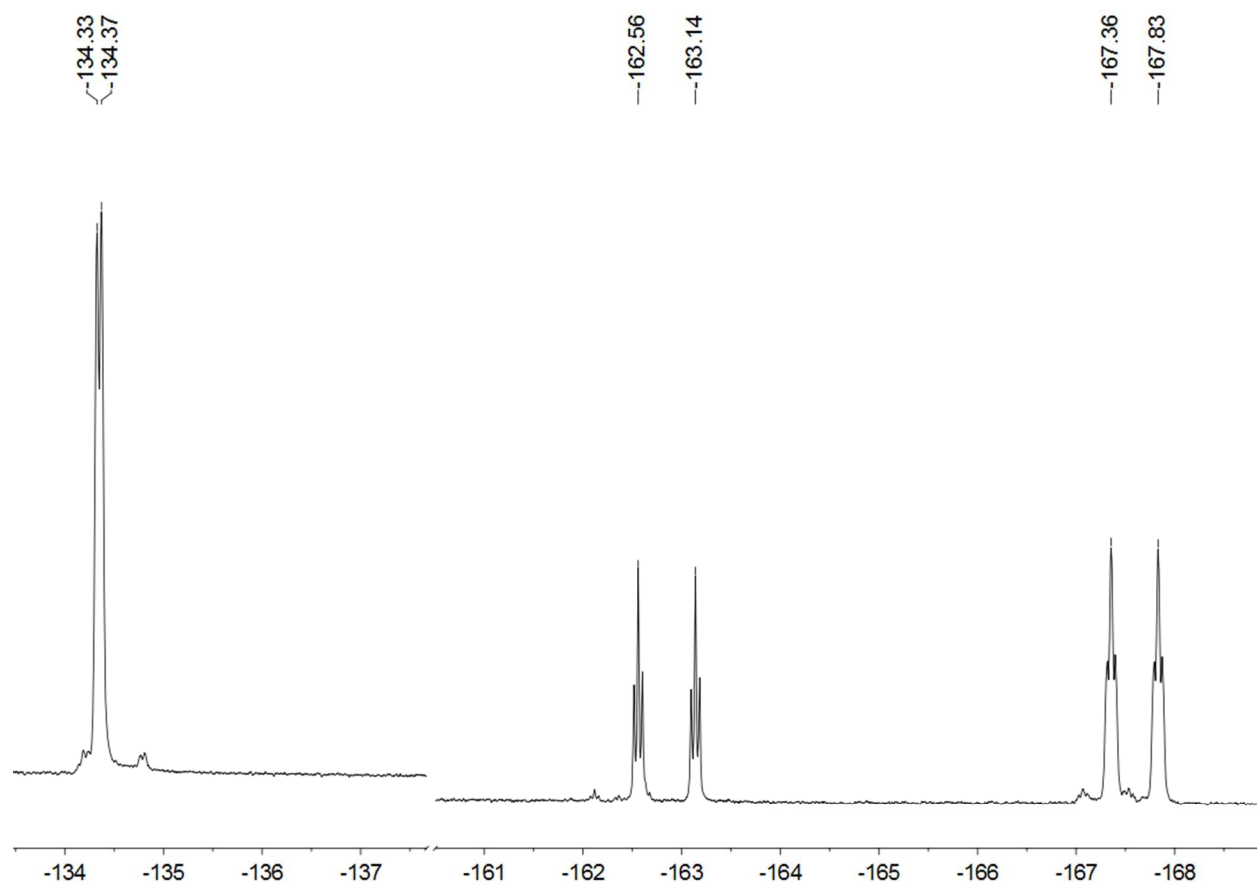

**Figure S22.**  $^{19}\text{F}$  NMR spectrum of  $\text{Et}_4\text{N}[\text{H}_4(\text{BAr}^{\text{F}_3})_2]$  in  $\text{CD}_2\text{Cl}_2$  solution.

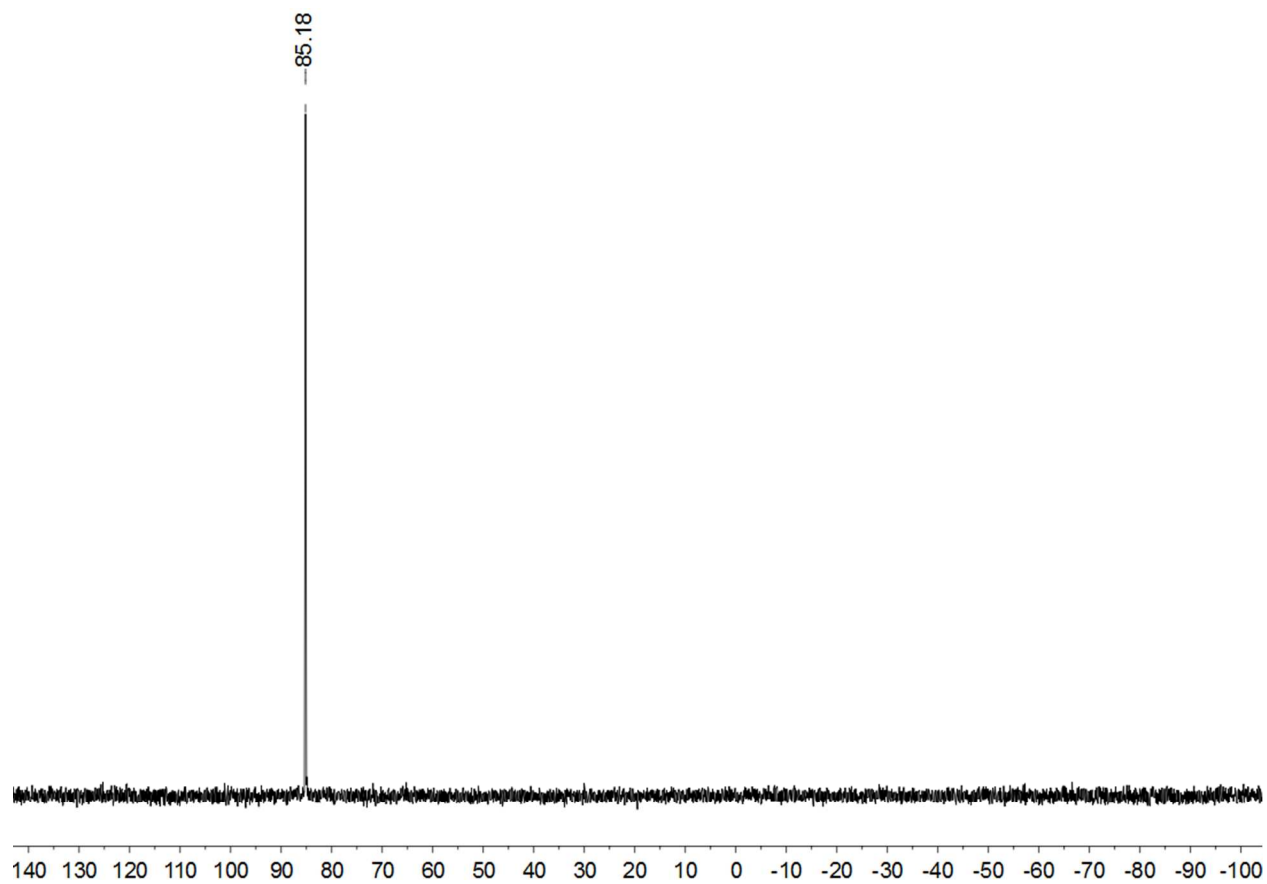

**Figure S23.**  $^{31}\text{P}$  NMR spectrum of  $\text{Et}_4\text{N}[\text{H}_4(\text{BAr}^{\text{F}_3})_2]$  in  $\text{CD}_2\text{Cl}_2$  solution.

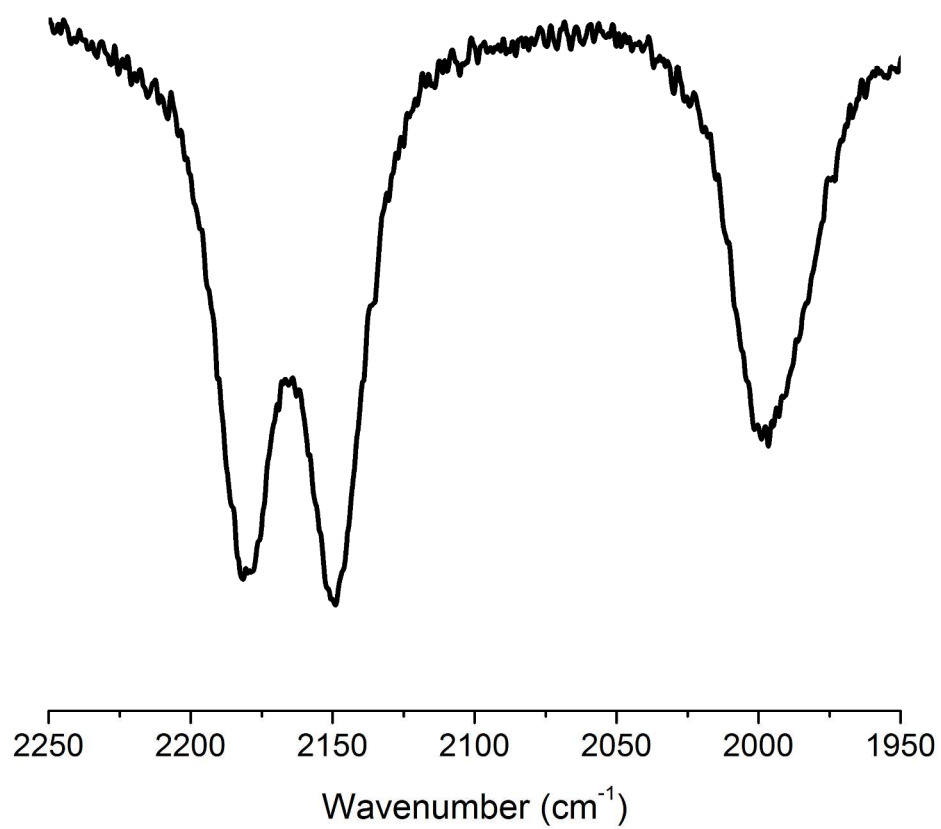

**Figure S24.** IR spectrum of Et<sub>4</sub>N[Cl<sub>3</sub>(BAr<sup>F</sup><sub>3</sub>)<sub>2</sub>] in CH<sub>2</sub>Cl<sub>2</sub> solution.

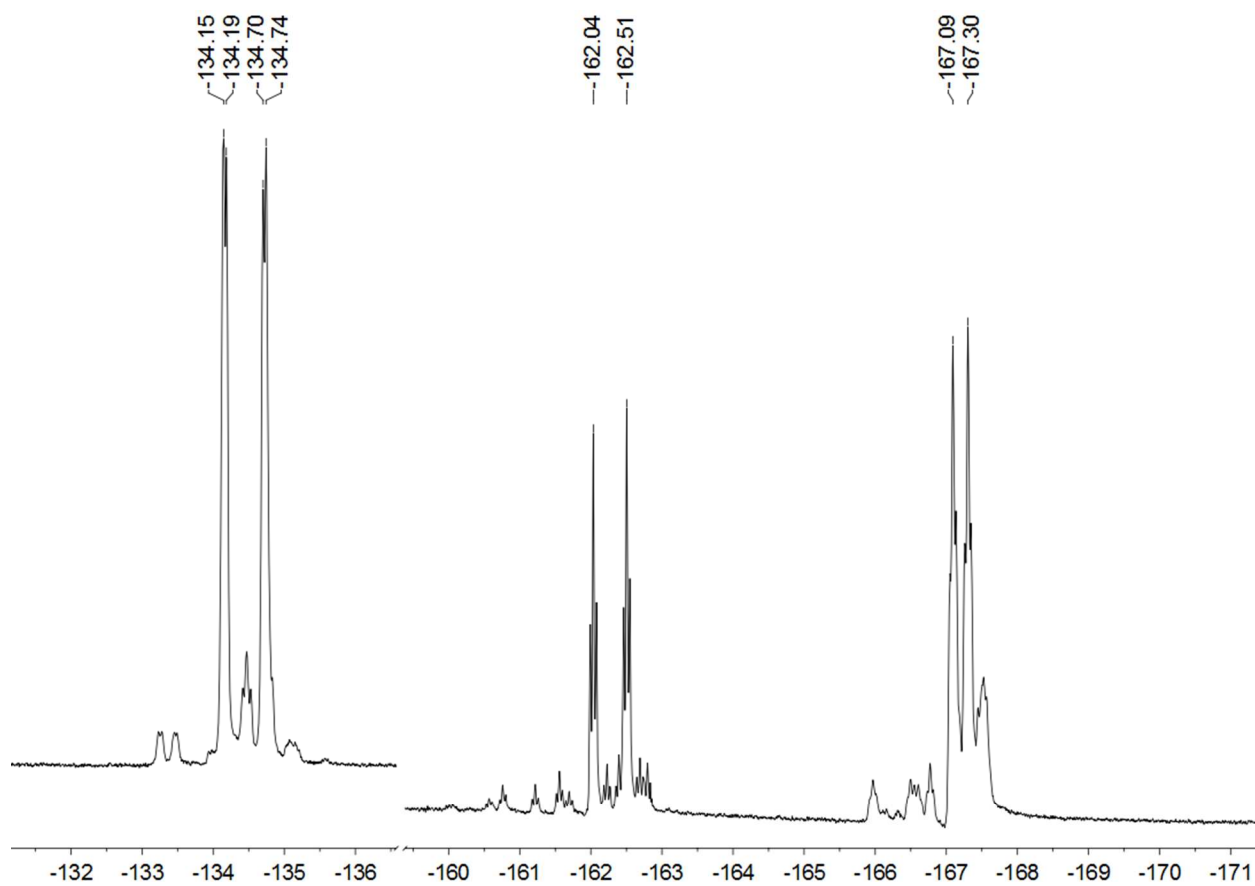

**Figure S25.**  $^{19}\text{F}$  NMR spectrum of  $\text{Et}_4\text{N}[\text{Cl}_3(\text{BAr}^{\text{F}}_3)_2]$  in  $\text{CD}_2\text{Cl}_2$  solution.

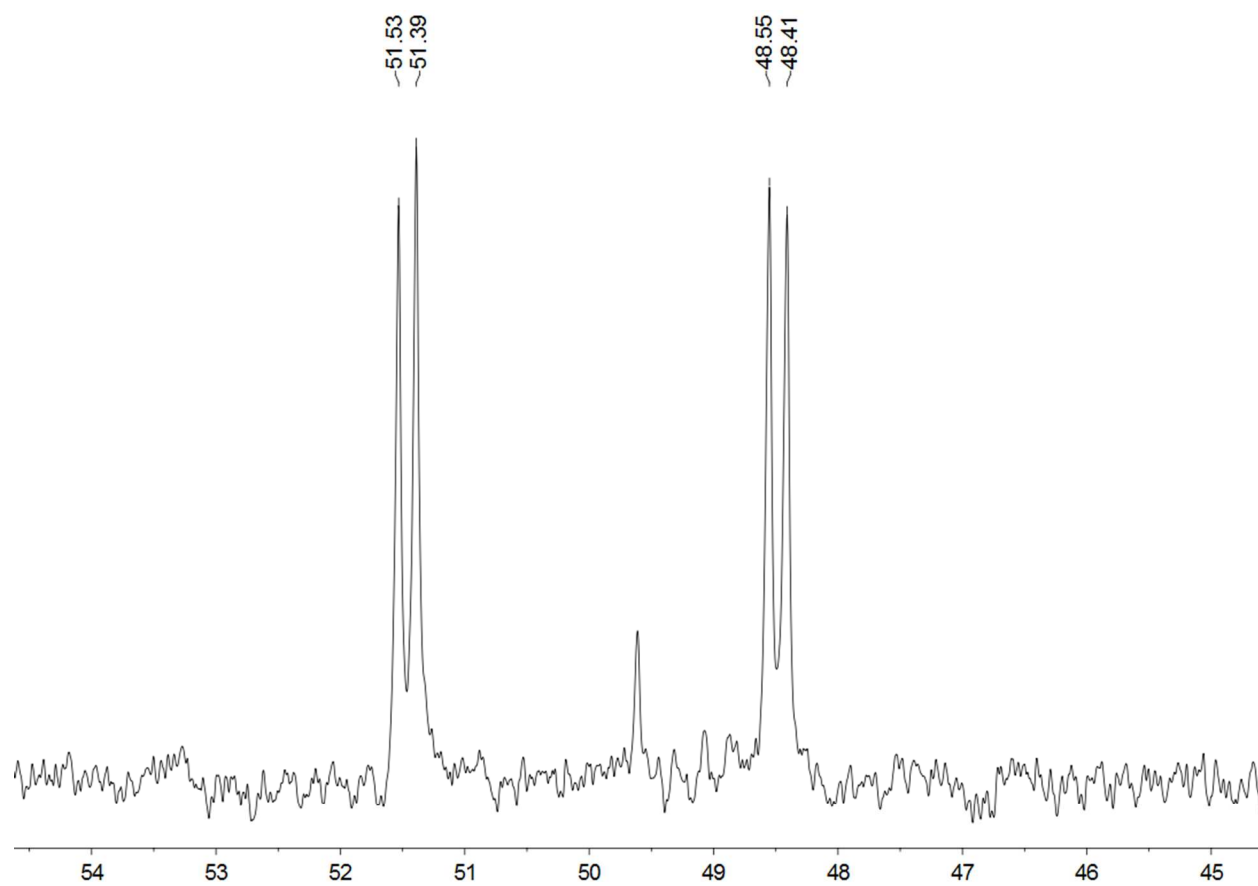

**Figure S26.**  $^{31}\text{P}$  NMR spectrum of  $\text{Et}_4\text{N}[\text{Cl}_3(\text{BAr}^{\text{F}}_3)_2]$  in  $\text{CD}_2\text{Cl}_2$  solution.



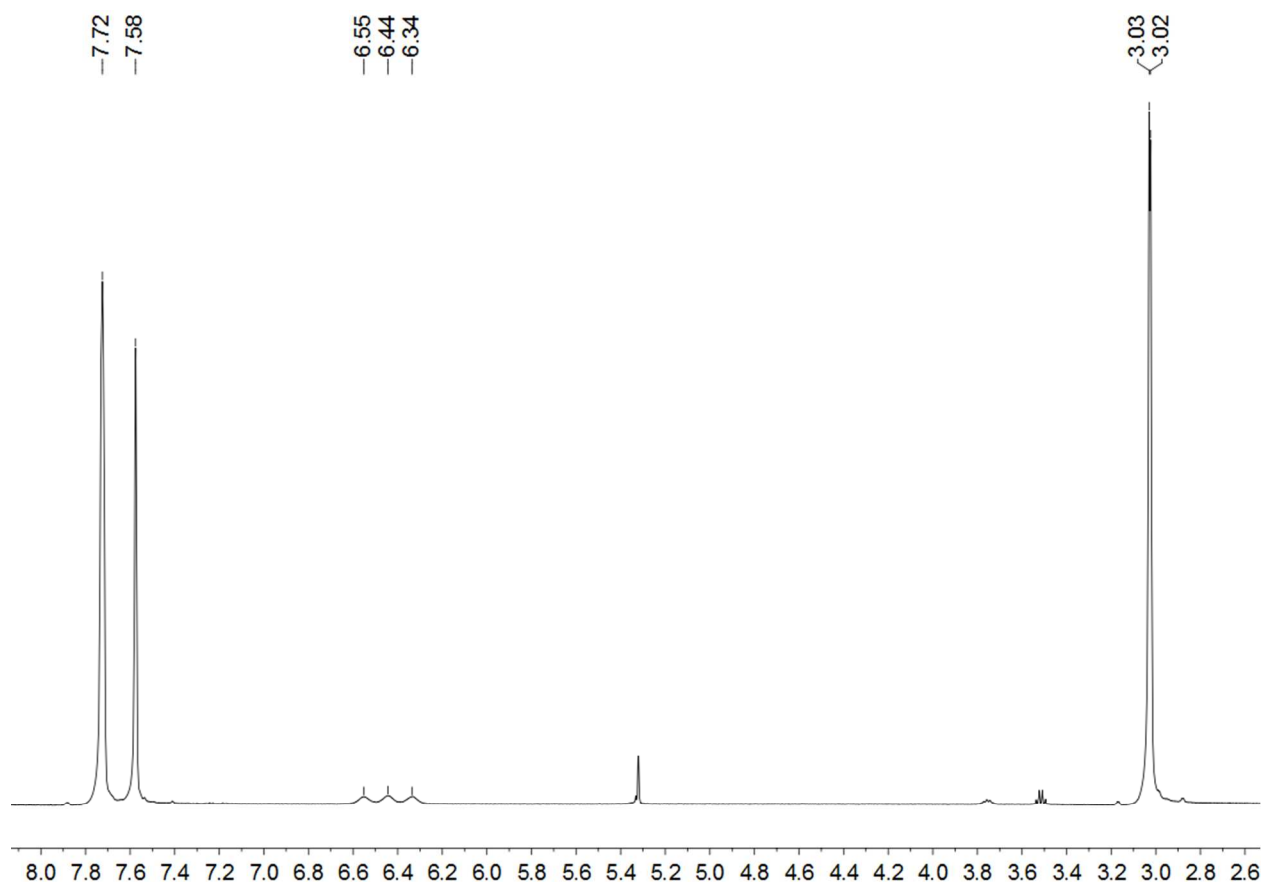

**Figure S27.**  $^1\text{H}$  NMR spectrum of  $\text{HNMe}_3\text{BAr}^{\text{F}24}$  in  $\text{CD}_2\text{Cl}_2$  solution.

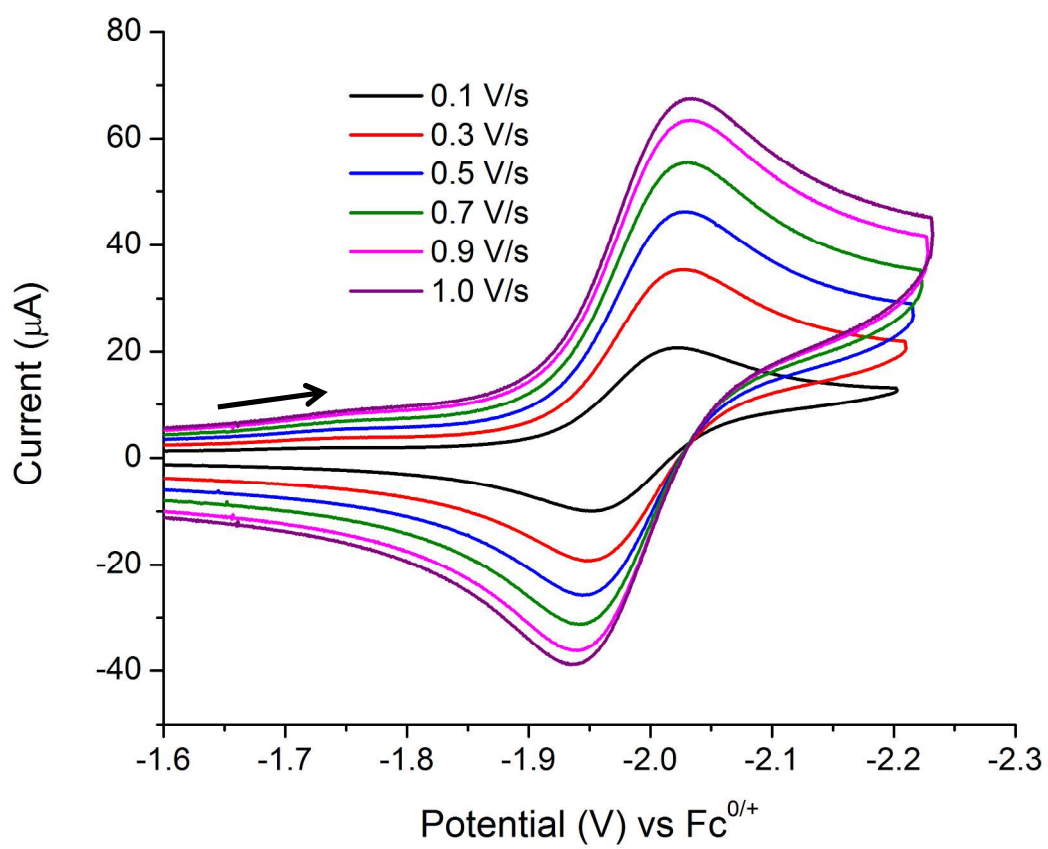

**Fig S28.** Cyclic voltammogram of the reduction of  $\text{Et}_4\text{N}[\text{H}_3(\text{BAr}^{\text{F}}_3)_2]$  at varying scan rates in  $\text{CH}_2\text{Cl}_2$  ( $25^\circ\text{C}$ ).

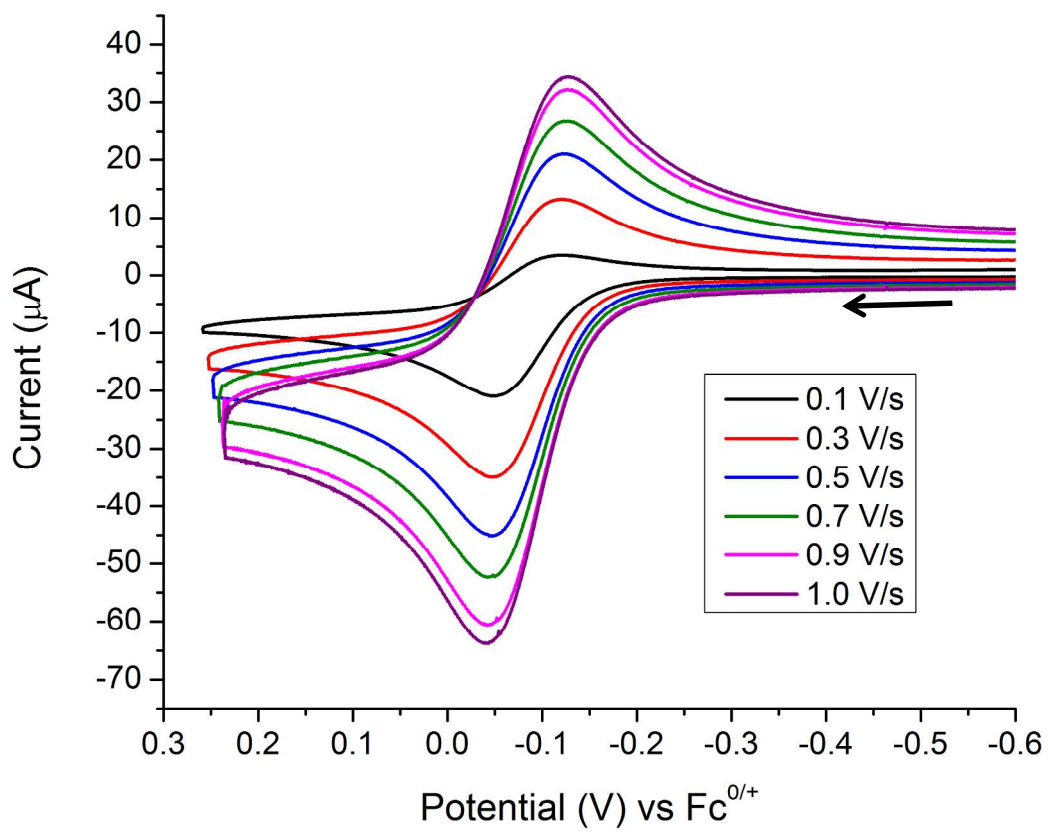

**Fig S29.** Cyclic voltammogram of the oxidation of  $\text{Et}_4\text{N}[\text{H}_3(\text{BAr}^{\text{F}_3})_2]$  at varying scan rates in  $\text{CH}_2\text{Cl}_2$  ( $25^\circ\text{C}$ ).

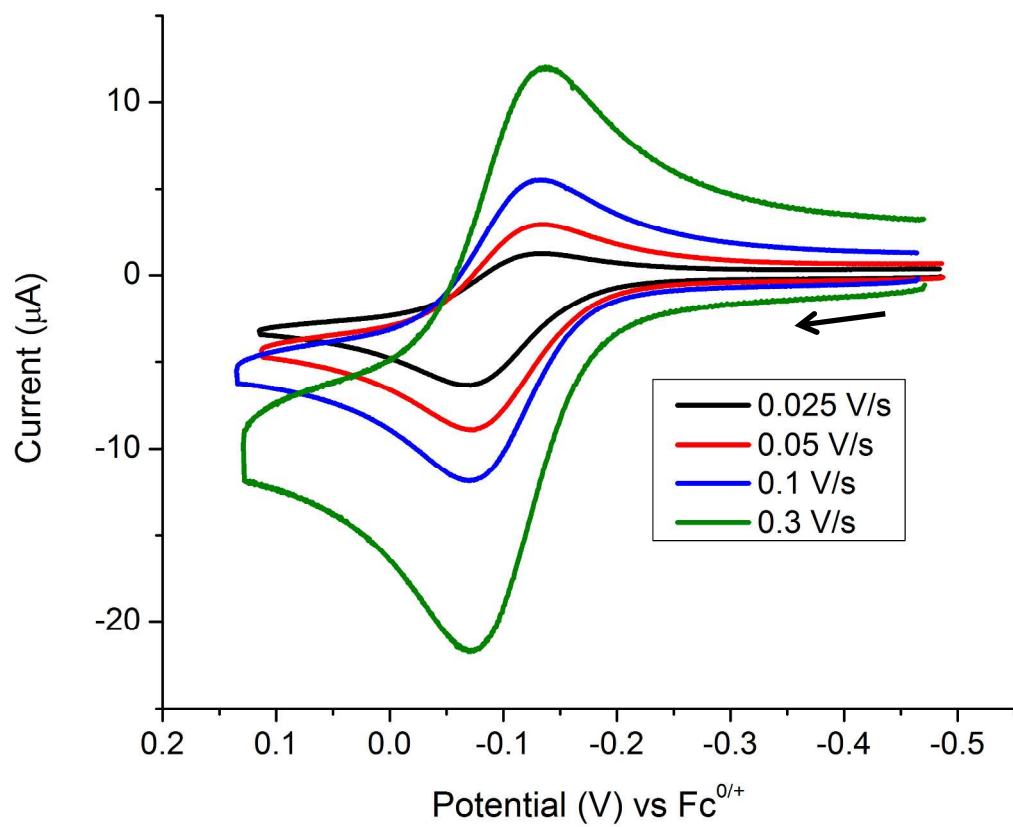

**Fig S30.** Cyclic voltammogram of the oxidation of Et<sub>4</sub>N[H<sub>4</sub>(BAr<sup>F</sup><sub>3</sub>)<sub>2</sub>] at varying scan rates in CH<sub>2</sub>Cl<sub>2</sub> (25°C).

### Determination of the equilibrium constant for dihydrogen bonding:

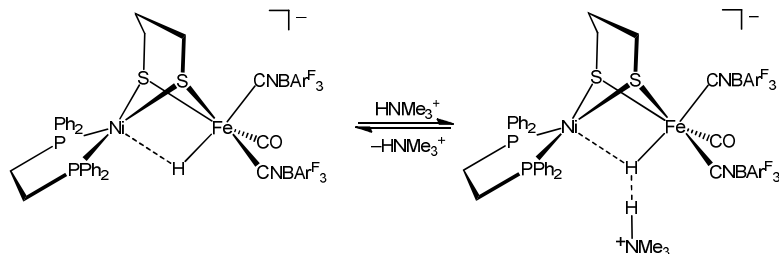

A plot of  $\delta_{\text{obs}}$  vs  $[\text{HNMe}_3^+]_o$  was fit by the equation:<sup>5</sup>

$$\delta_{\text{obs}} = \delta_{\text{MH}} + \frac{1}{2[\text{MH}]_o} (\delta_{\text{MHHN}} - \delta_{\text{MH}}) \left[ ([\text{MH}]_o + [\text{HN}]_o + 1/K) - \sqrt{([\text{MH}]_o + [\text{HN}]_o + 1/K)^2 - 4[\text{MH}]_o[\text{HN}]_o} \right]$$

Where:

$\delta_{\text{obs}}$  = Observed hydride chemical shift of in the presence of  $\text{HNMe}_3^+$

$\delta_{\text{MH}}$  = Hydride chemical shift of  $[\text{H3}(\text{BAR}^{\text{F}_3})_2]^\square$  in the absence of  $\text{HNMe}_3^+$

$\delta_{\text{MHHN}}$  = Hydride chemical shift of  $[\text{H3}(\text{BAR}^{\text{F}_3})_2]^\square$  in the presence of excess  $\text{HNMe}_3^+$

$[\text{MH}]_o$  : Initial concentration of  $[\text{H3}(\text{BAR}^{\text{F}_3})_2]^\square$

$[\text{HN}]_o$  : Initial concentration of  $\text{HNMe}_3^+$

$K$  = Equilibrium constant for formation of a dihydrogen bond between  $[\text{H3}(\text{BAR}^{\text{F}_3})_2]^\square$  and  $\text{HNMe}_3^+$

**Table S2.**  $^1\text{H}$  NMR signals for the titration of  $\text{Et}_4\text{N}[\text{H3}(\text{BAR}^{\text{F}_3})_2]$  with  $\text{HNMe}_3\text{BAR}^{\text{F}_3}$ <sup>F24</sup>

| mol $\text{HNMe}_3^+$ | $[\text{HNMe}_3^+]$ (M) | $\delta$ (ppm) |
|-----------------------|-------------------------|----------------|
| 0                     | 0                       | -7.09          |
| 1.4E-6                | 1.4E-3                  | -8.69          |
| 2.8E-6                | 2.8E-3                  | -9.03          |
| 4.2E-6                | 4.2E-3                  | -9.11          |
| 5.6E-6                | 5.6E-3                  | -9.16          |

The unknown values of  $\delta_{\text{MHHN}}$  and  $K$  were determined by a nonlinear fit of experimental values using the Leven-Marquardt algorithm. The values were determined to be  $\delta_{\text{MHHN}} = \square 9.20 \pm 0.02$  ppm and  $K = 9.0 \pm 1.0 \times 10^4$  L/mol.

**Table S3.**  $\text{H}_2$  Production from  $\text{Et}_4\text{N}[\text{H3}(\text{BAR}^{\text{F}_3})_2]$  and  $\text{PhNH}_3\text{BAR}^{\text{F}_3} \cdot 2\text{Et}_2\text{O}$

| Run | Mass of $\text{Et}_4\text{N}[\text{H3}(\text{BAR}^{\text{F}_3})_2]$ (mg) | $\mu\text{mol}$ $\text{Et}_4\text{N}[\text{H3}(\text{BAR}^{\text{F}_3})_2]$ | $\mu\text{mol}$ of $\text{H}_2$ detected | mol% $\text{H}_2$ |
|-----|--------------------------------------------------------------------------|-----------------------------------------------------------------------------|------------------------------------------|-------------------|
| 1   | 3.0                                                                      | 1.62                                                                        | 1.69                                     | 104%              |
| 2   | 3.0                                                                      | 1.62                                                                        | 1.51                                     | 93%               |
| 3   | 3.3                                                                      | 1.78                                                                        | 1.91                                     | 107%              |

Calculated mol% of  $\text{H}_2 = 101 \pm 7\%$

### Electrocatalytic Oxidation of H<sub>2</sub>

To a 1mM solution of Et<sub>4</sub>N[H<sub>3</sub>(BAR<sup>F</sup><sub>3</sub>)<sub>2</sub>] in CH<sub>2</sub>Cl<sub>2</sub> with 100 mM Bu<sub>4</sub>NPF<sub>6</sub>, aliquots of a standard DBU solution in CH<sub>2</sub>Cl<sub>2</sub> (0.26 M, 0.193 mL of DBU in 5 mL of CH<sub>2</sub>Cl<sub>2</sub>) were added. H<sub>2</sub> gas was bubbled through the solution for 5 min immediately prior to scans.

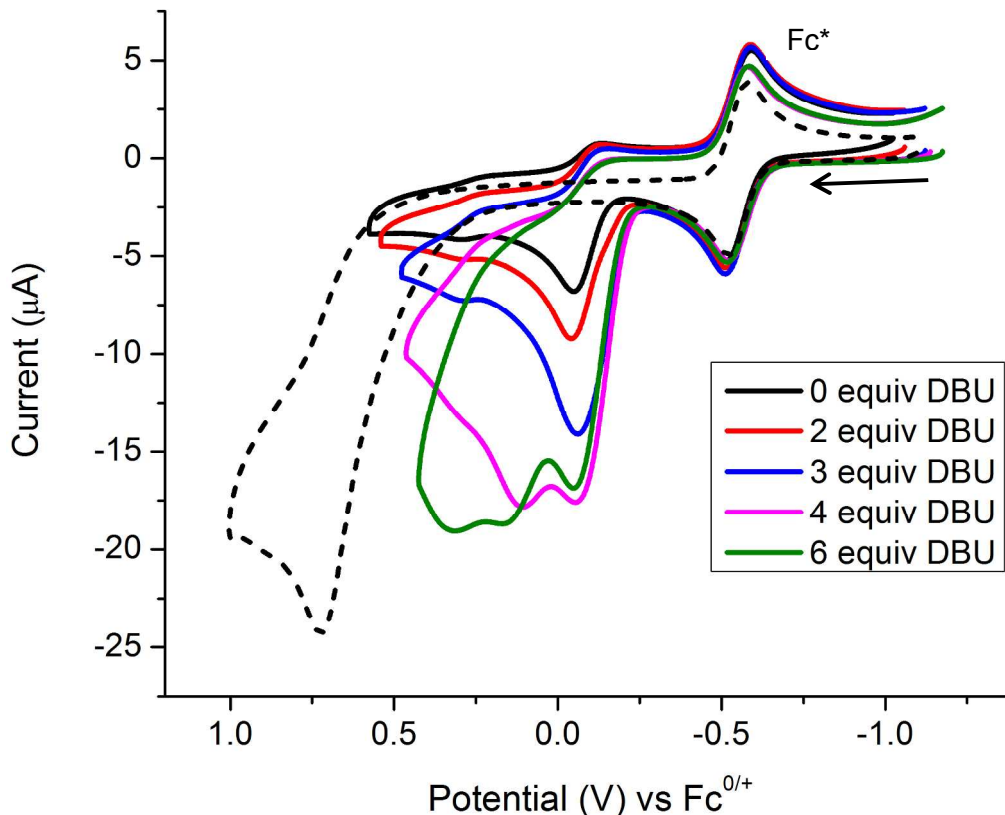

**Fig S31.** Cyclic voltammogram of the oxidation of Et<sub>4</sub>N[H<sub>3</sub>(BAR<sup>F</sup><sub>3</sub>)<sub>2</sub>] in CH<sub>2</sub>Cl<sub>2</sub> with increasing amounts of DBU under 1 atm of H<sub>2</sub> at a scan rate at 0.05 V/s (25°C). Decamethylferrocene (Fc\*) used as an internal reference ( $\square$  0.55 V vs Fc<sup>0/+</sup>). 6 equiv of DBU with 1 atm of H<sub>2</sub> in the absence of Et<sub>4</sub>N[H<sub>3</sub>(BAR<sup>F</sup><sub>3</sub>)<sub>2</sub>] shown in dashed black line.

Turnover frequency ( $k_{obs}$ ) of 0.98 s<sup>-1</sup> was determined by the method described by Bullock *et al.* (*Nat. Chem.* **2013**, 5, 228-233).

$$\frac{i_{cat}}{i_p} = \frac{n}{0.4463} \sqrt{\frac{RTk_{obs}}{Fv}}$$

$i_{cat}$  = maximum peak height in the presence of base

$i_p$  = peak height in the absence of base

R = gas constant

T = temperature in Kelvin

F = Faraday's constant

v = scan rate (V/s)

**References**

- (1) Barton, B. E.; Whaley, C. M.; Rauchfuss, T. B.; Gray, D. L. "Nickel-Iron-Dithiolato-Hydrides Relevant to the [NiFe]-Hydrogenase Active Site" *J. Am. Chem. Soc.* **2009**, *131*, 6942.
- (2) Carroll, M. E.; Barton, B. E.; Gray, D. L.; Mack, A. E.; Rauchfuss, T. B. "Active-Site Models for the Nickel-Iron Hydrogenases: Effects of Ligands on Reactivity and Catalytic Properties" *Inorg. Chem.* **2011**, *50*, 9554.
- (3) Kayal, A.; Rauchfuss, T. B. "Protonation studies of the new iron carbonyl cyanide *trans*-Fe(CO)(3)(CN)(2) (2-): Implications with respect to hydrogenases" *Inorganic Chemistry* **2003**, *42*, 5046.
- (4) Li, Z.; Ohki, Y.; Tatsumi, K. "Dithiolato-Bridged Dinuclear Iron-Nickel Complexes [Fe(CO)2(CN)2(*m*-SCH2CH2CH2S)Ni(S2CNR2)]- Modeling the Active Site of [NiFe] Hydrogenase" *J. Am. Chem. Soc.* **2005**, *127*, 8950.
- (5) Donghi, D.; Beringhelli, T.; D'Alfonso, G.; Mondini, M. "NMR investigation of the dihydrogen-bonding and proton-transfer equilibria between the hydrido carbonyl anion HRe2(CO)(9) (-) and fluorinated alcohols" *Chemistry-a European Journal* **2006**, *12*, 1016.
